# Supplementary material for: Single-cell RNA sequencing uncovers the nuclear decoy lincRNA PIRAT as a regulator of systemic monocyte immunity during COVID-19
Source: PubMed Central journal article supplement (PMC9457492; doi:10.1073/pnas.2120680119), 2022-08-23
Supplement: pnas.2120680119.sapp.pdf [file pnas.2120680119.sapp.pdf]

## Supplementary Information for

Single cell RNA sequencing uncovers the nuclear decoy lincRNA PIRAT as a regulator of systemic monocyte immunity during COVID-19.

Marina Aznaourova<sup>†</sup>, Nils Schmerer<sup>†</sup>, Harshavardhan Janga, Zhenhua Zhang, Kim Pauck, Judith Bushe, Sarah M Volkers, Daniel Wendisch, Philipp Georg, Evgenia Ntini, Michelle Aillaud, Margrit Gündisch, Elisabeth Mack, Chrysanthi Skevaki, Christian Keller, Christian Bauer, Wilhelm Bertrams, Annalisa Marsico, Andrea Nist, Thorsten Stiewe, Achim D Gruber, Clemens Ruppert, Yang Li, Holger Garn, Leif E Sander, Bernd Schmeck and Leon N Schulte<sup>\*</sup>.

<sup>\*</sup>Leon N Schulte

Email: [leon.schulte@uni-marburg.de](mailto:leon.schulte@uni-marburg.de)

### This PDF file includes:

Figures S1 to S16  
Tables S1 to S9  
Supplementary Methods

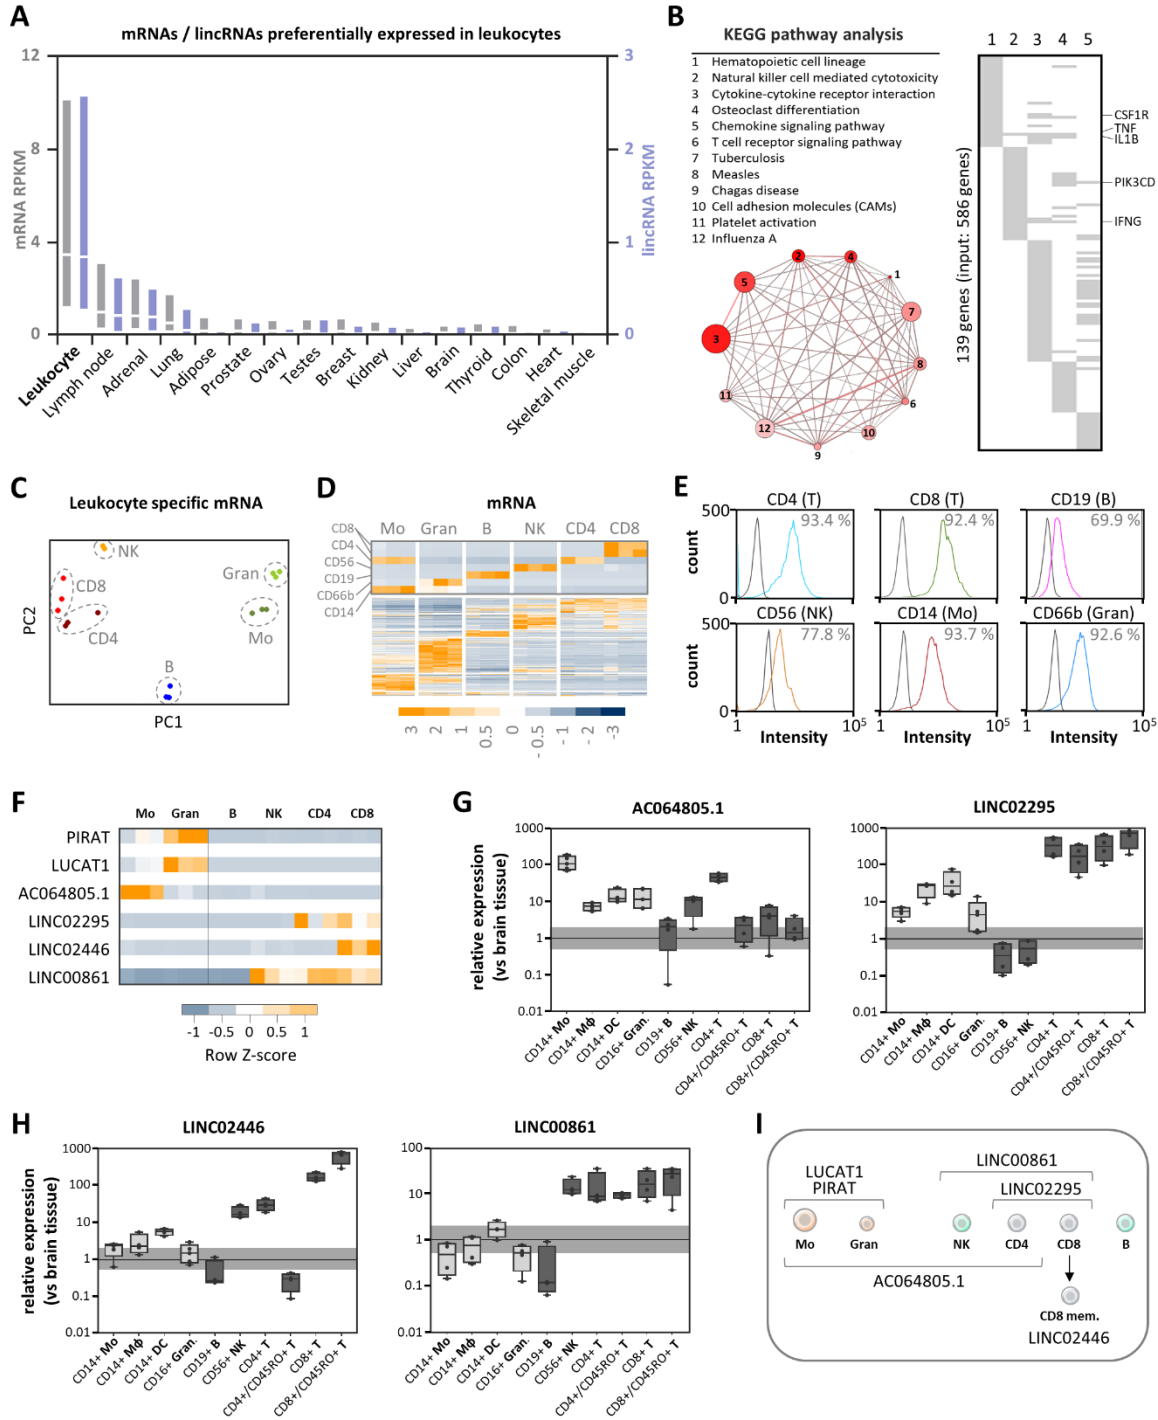

**Fig. S1. Identification of myeloid and lymphoid lincRNAs signatures.** A) mRNA and lincRNA expression levels (median + inner quartiles) in indicated tissues (Human Bodymap). B) Consensus Path DB KEGG pathway analysis (top left) and induced network analysis (lower left) of mRNAs from A. Pathway size = circle size. Candidates contained: color-coded (light to dark red). Overlap between pathways = line thickness. Overlap of genes contained in the top 5 pathways is illustrated in the right panel (each grey cell stands for one gene). Genes annotated in at least 3 signaling pathways are indicated. C) and D) PCA analysis with leukocyte-enriched lincRNAs and clustering of mRNAs from A (cell type markers indicated). E) Overlay histogram FACS plots showing

successful enrichment of the indicated cell populations by MACS (left peak: unstained control; right peak: cells stained for indicated surface antigen). F) RNA-Seq based row Z-scores of selected myeloid (top 3) and lymphoid (bottom 3) lincRNA markers (data from Fig. 1B). G) and H) qRT-PCR validation of lincRNAs from indicated purified cell types, relative to human brain reference tissue. Horizontal bar indicates base-line (black) and 2-fold deviation from base-line (grey). Box plots and individual replicate values from four independent experiments are shown. I) Summary of lincRNA expression patterns in the studied leukocyte populations.

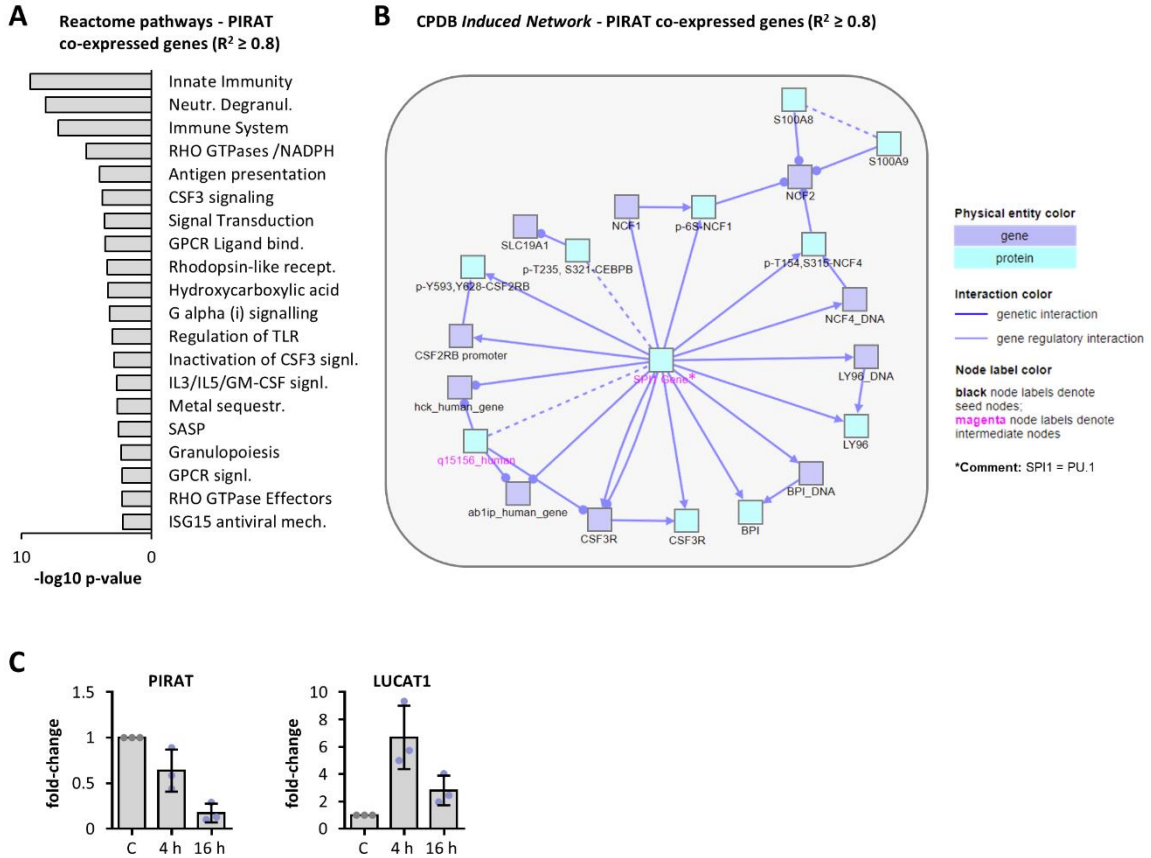

**Fig. S2. PIRAT co-expression network.** A) Consensus Path DB reactome pathway analysis and B) Consensus Path DB induced network analysis of genes co-expressed with PIRAT in RNA-seq datasets from Fig. 1. C) qRT-PCR analysis of PIRAT and LUCAT1 expression in primary monocytes in response to LPS + polyI:C (4 and 16 h stimulation, compared to respective unstimulated control). C: 3 independent experiments.

**A**

**Raw data** (forced pipeline)

1. Target panel: 454 (mRNA), 3 (antibody)
2. Kept features: 421 (mRNA), 3 (AB)
3. Kept reads: 2,625,996 (4.36M)
4. Kept cells: 19,030 (30K)

**Clean data** ( $25 \leq nFeatures$ ,  $1e3 \leq nCounts \leq 7e4$ )

1. Kept features: 411 (mRNA), 3 (AB)
2. Kept cells: 15,278

**B**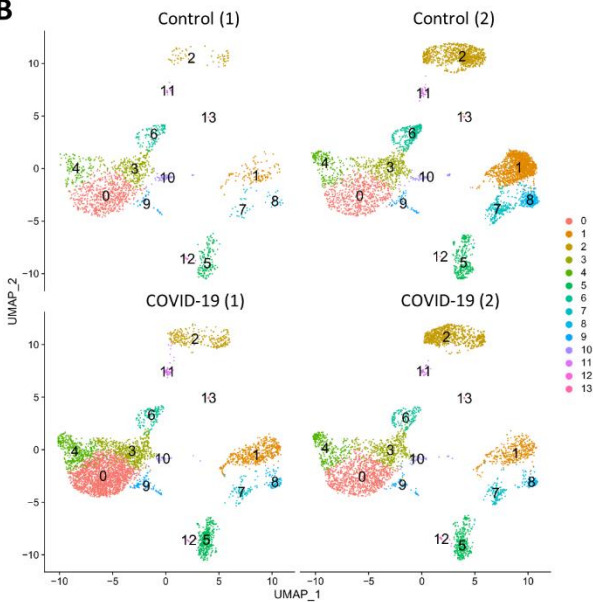**C**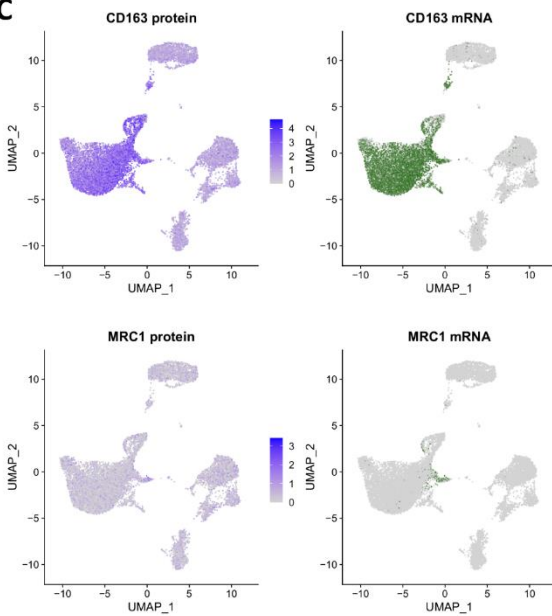**D**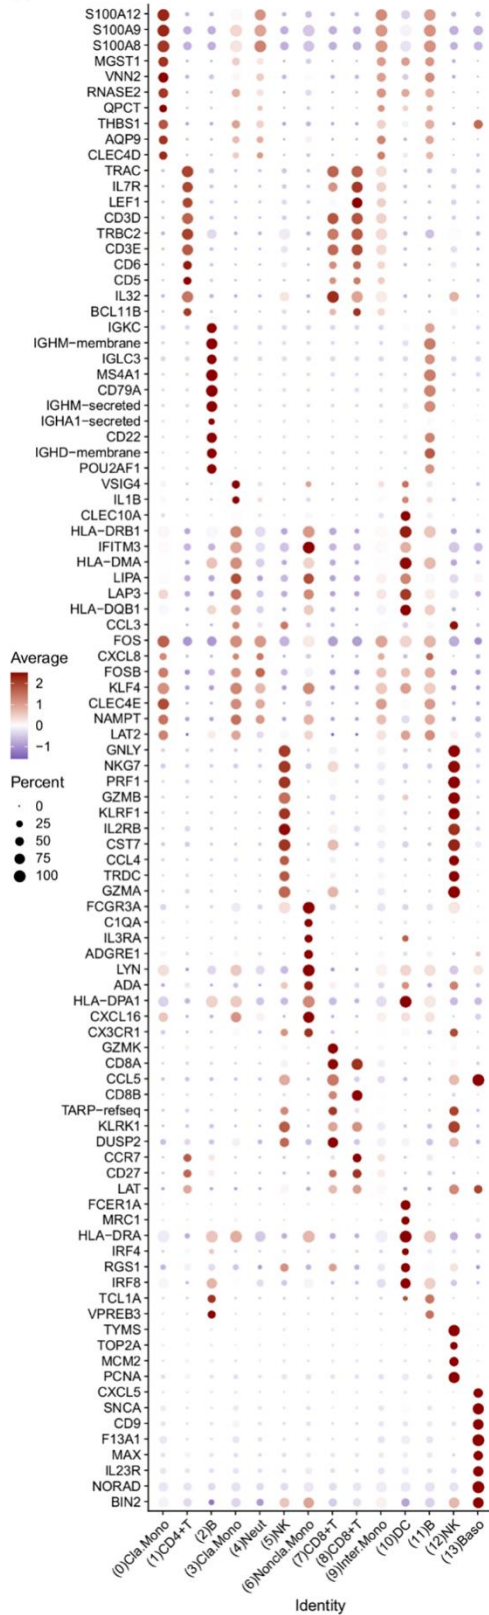

**Fig. S3. PBMC single cell RNA-seq data analysis.** A) Illustration of data analysis strategy and statistics. B) UMAP plots showing the clustering of cell types in the indicated control and COVID-19 patient scRNA-seq datasets. C) UMAP plots showing surface protein marker (AbSeq) and mRNA detection for CD163 (myeloid marker) and MRC1 (dendritic cell / monocyte marker) in aggregated control and COVID-19 patient scRNA-seq data. D) Dot plot showing the color-coded average expression and the percentage of positive cells for characteristic mRNA/lincRNA markers in the indicated cell populations.

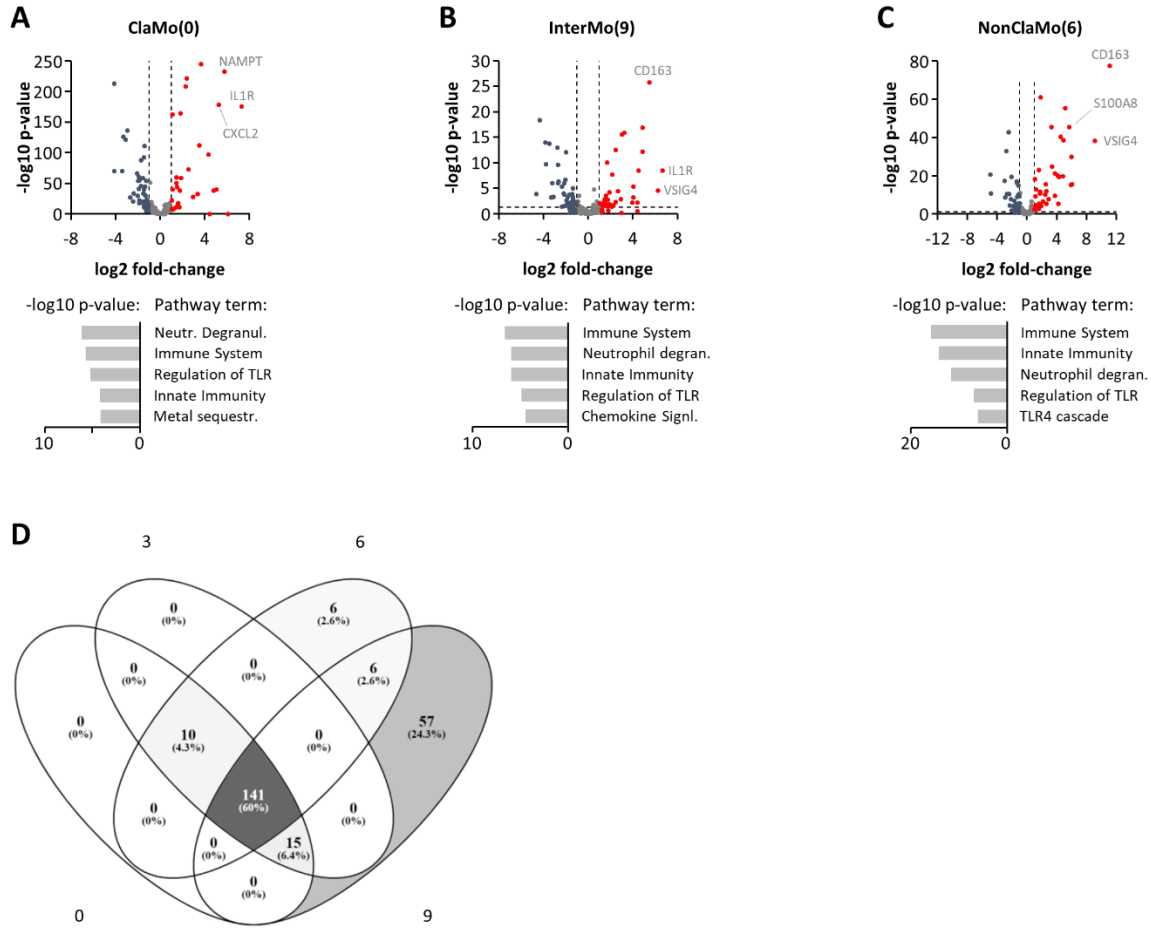

**Fig. S4. Monocyte response in COVID-19 (differential gene expression).** A) to C) Top: volcano plots showing gene expression changes in classical, intermediate and non-classical monocyte populations in COVID-19 compared to control patients (based on scRNA-seq data shown in Fig. S3). Top 3 induced mRNAs are indicated. Bottom: Consensus Path DB Reactome pathway analysis with significantly up-regulated mRNAs (top 5 pathways are shown). D) Overlap of differentially expressed genes in the respective monocyte populations (numbers denote cell populations defined in Fig. 2C and Fig. S3D).

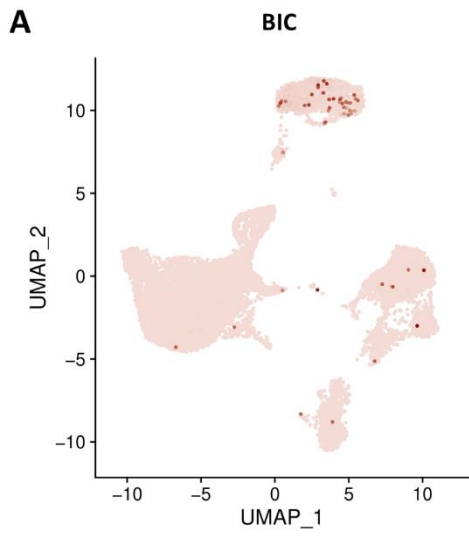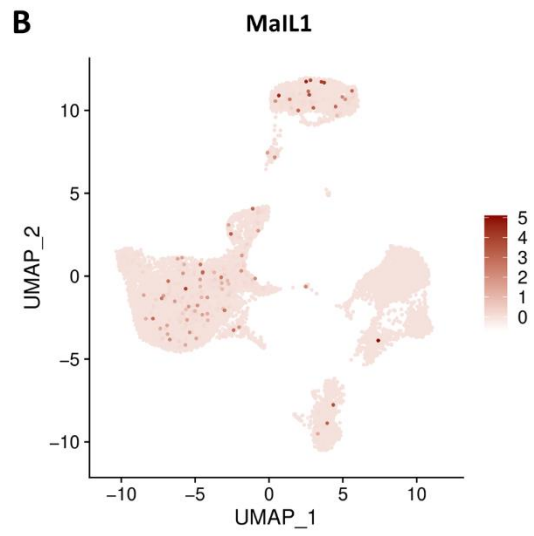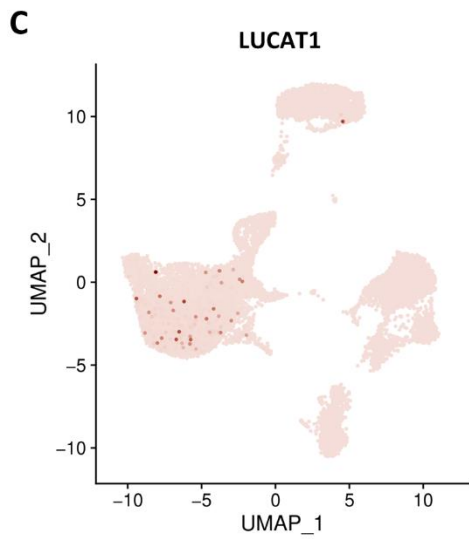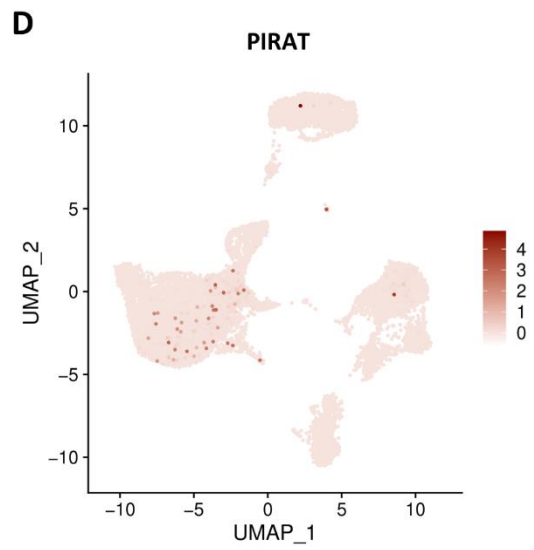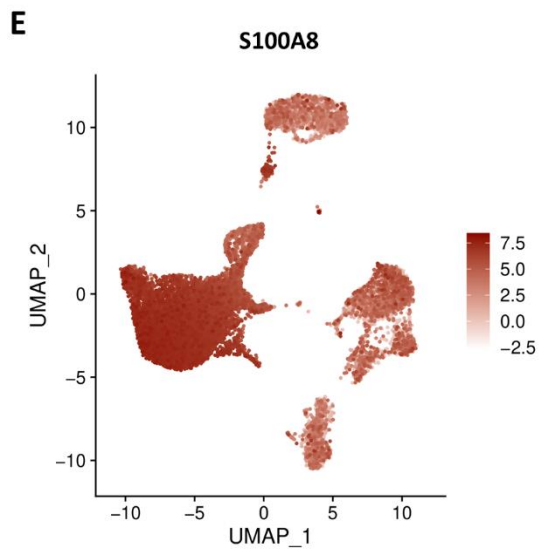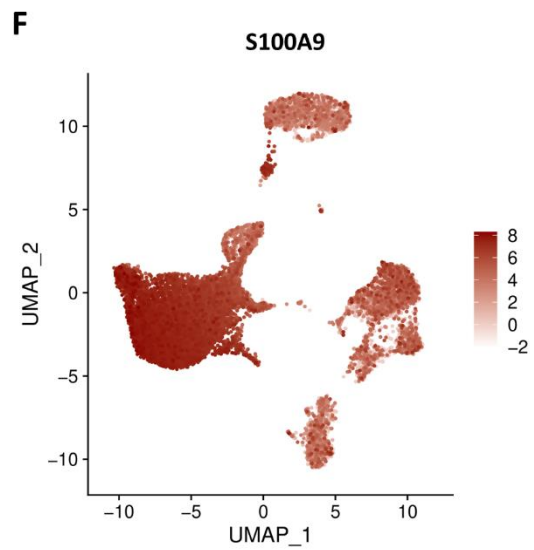



**Fig. S5. UMAP analysis of marker expression in scRNA-seq data.** A-F) UMAP plots illustrating the distribution of BIC, Mall1, LUCAT1, PIRAT, S100A8 and S100A9 positive cells in scRNA-seq data from Fig. 2. Background: single cell populations from Fig. 2C. Red dots: Cells positive for the respective marker (expression level color-coded according to the legend in each plot; [min-max scale]).

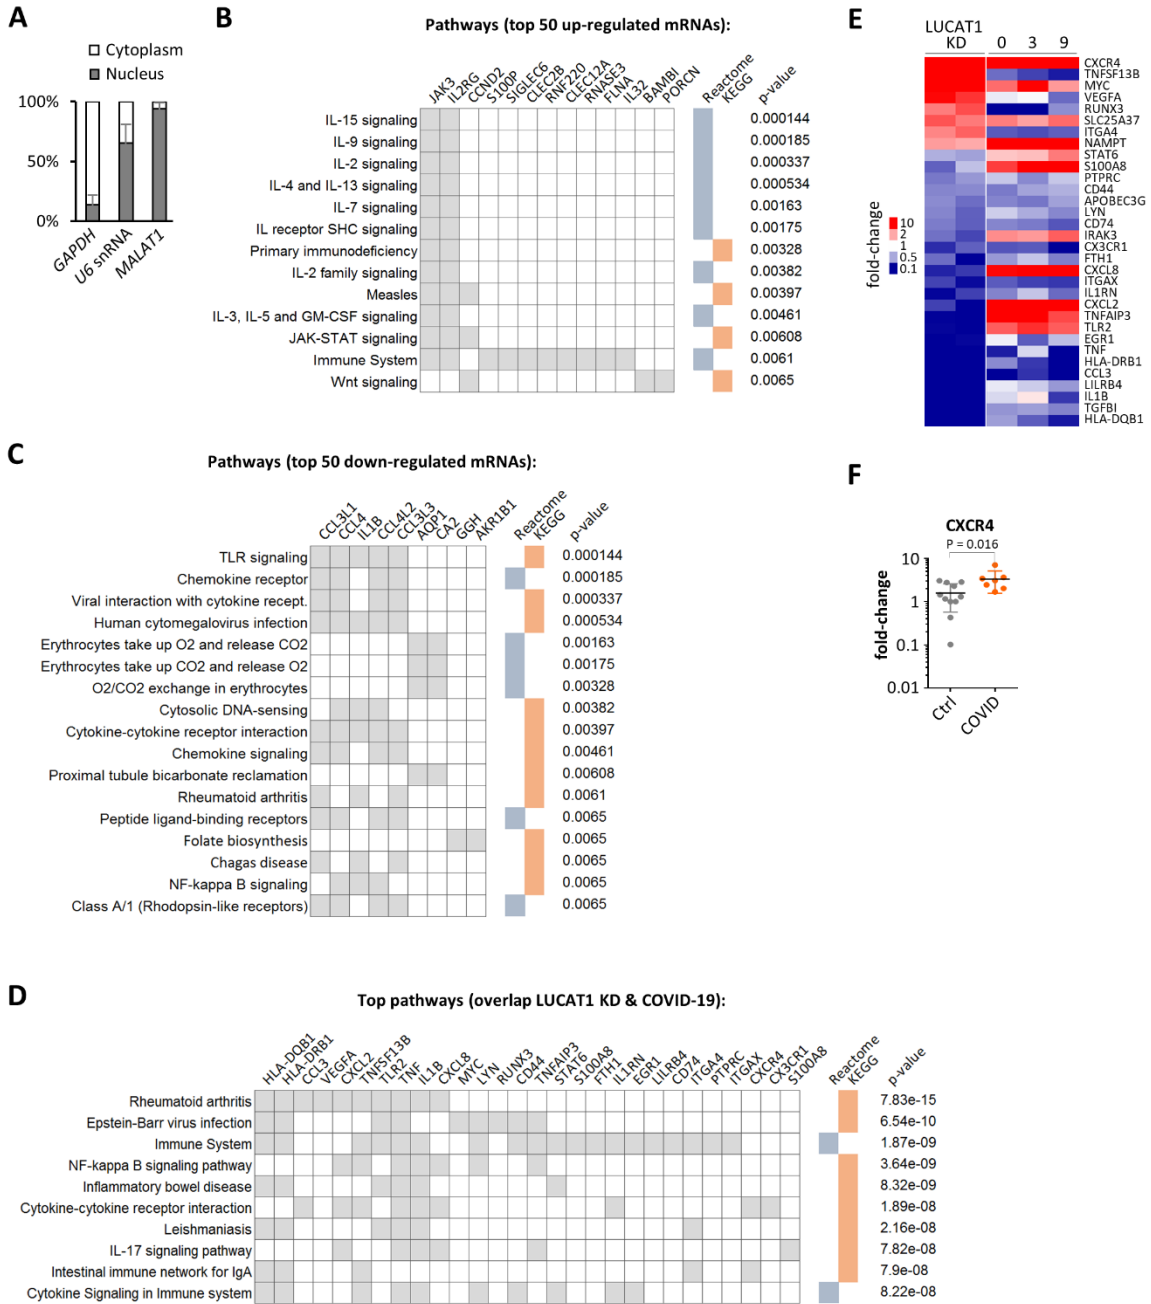

**Fig. S6. Influence of LUCAT1 on the human monocyte immune response.** A) Primary human monocyte subcellular fractionation qRT-PCR. Distribution of GAPDH mRNA, U6 snRNA and the MALAT1 lncRNA in nuclear and cytoplasmic fractions is shown in percent (mean and standard-deviation, based on three independent experiments). B-C) Consensus Path DB KEGG and Reactome pathway analysis of top 50 genes, up-regulated (panel B) or down-regulated (panel C) upon LUCAT1 knockdown. Pathway terms, pertaining genes, pathway sources and p-values are shown. Grey fill color indicates that a given gene is included in the respective pathway. D) Same as B-C, but with genes from Fig. 3E (Venn diagram overlap). E) Heatmap, showing the fold-changes of genes regulated  $\geq 2$ -fold (up or down) upon LUCAT1 knockdown (THP1 RNA-seq data) and in the indicated monocyte populations in COVID-19 compared to control patients (scRNA-seq data). F) Validation of CXCR4 up-regulation in COVID-19 cohort whole PBMCs (qRT-PCR, control-patient 1 set as reference).

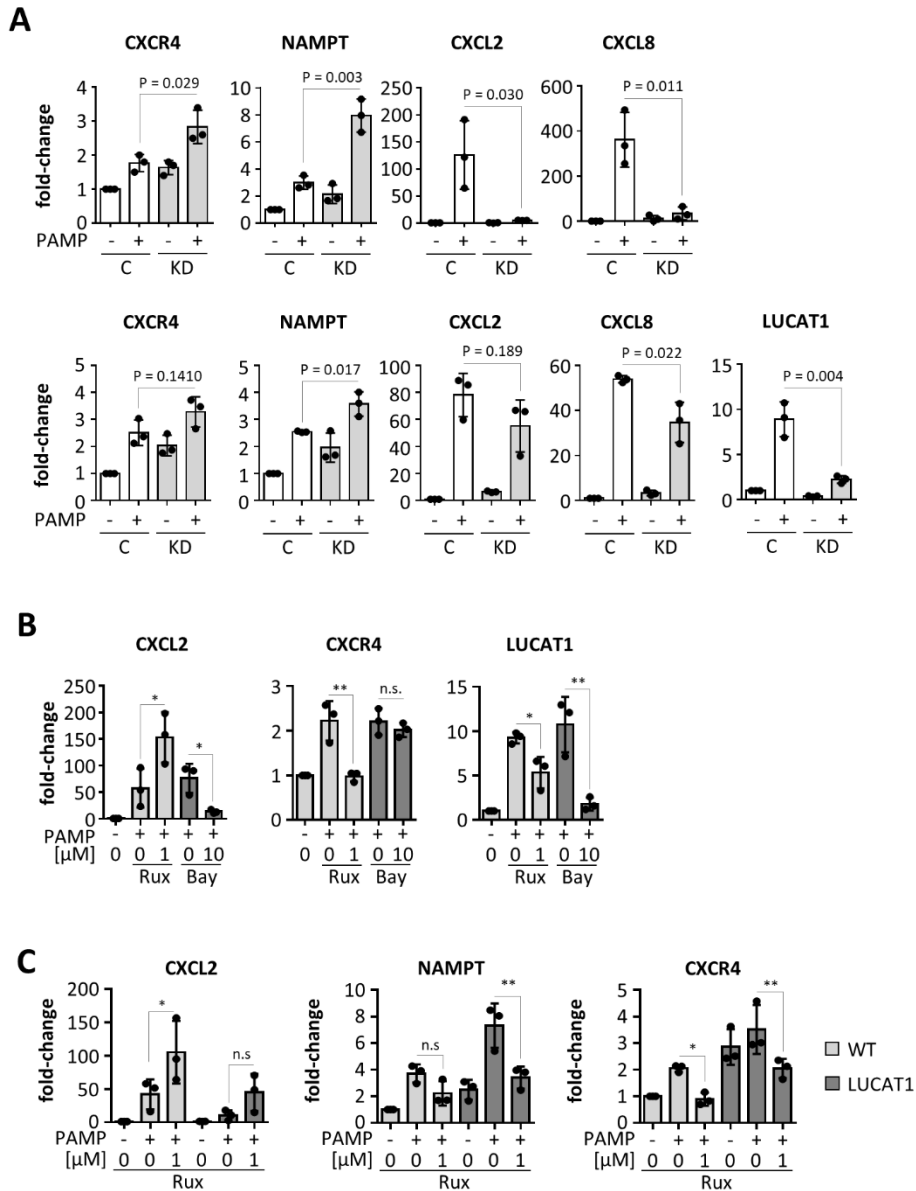

**Fig. S7: Influence of LUCAT1 and pathway inhibitors on immune marker expression.** A) qRT-PCR analysis of the expression of the indicated markers in control (C) and LUCAT1 knockdown (KD) THP1 monocytes, stimulated with LPS + polyI:C (PAMP) for 4 h or left untreated. Upper panel: results obtained with knockdown cell line from Fig. 3. Lower panel: results obtained with a second knockdown cell line, generated with an independent guideRNA (gRNA2, Table S7). Fold-changes relative to unstimulated control cells. B) Ruxolitinib and BAY-11-7082 sensitivity of CXCL2, CXCR4 and LUCAT1 (monocytes; PAMP = 4 h LPS + polyI:C; inhibitor pre-stimulation: 2 h). Fold-changes relative to unstimulated vehicle control. C) Rescue of CXCL2, NAMPT and CXCR4 dysregulation in LUCAT1 deficient THP1 cells (cell line from Fig. 3) upon 2 h Ruxolitinib treatment. A-C: One-way ANOVA, 3 independent experiments. \* =  $P \leq 0.05$ ; \*\*  $P \leq 0.01$ ; n.s. = no significant difference.

**A 5'/3' RACE-PCR result**

**>PIRAT\_cDNA\_sequence**

```
GAGGAACAGTCTTACTCTGTCACCCAGGCTGCAGTGTAGTGGTGTGATCACAGCTCACTGCAGCCTTGACCTCCTGGGC
TTAGGTGATCCTCCCACCTAGCCTCCCATGTAGCTGGGACTAGAGGTATGTGCCACCTCACCTCCTTTTTTCTTTTC
TTTTTCTTTTTTGGAGAGACAGATTCTTCTTATGTTGCTATTTTAAACTCCTGAACTCAAGTGATCCTCCTGCCTGGC
CTCCCAAAGTGCTGGGATTACAGGTGTGAGACACTGCACCCTGCCAAGCACCTCTGCTCCGTGCCATGCTCTTGGCTA
ATTGGAGTTGTGAAAGGCATGAGGATTCCTGGTTCATGGACTCAGCTCTCCCATAGGGTTCTGACACCAAAGCAATGGTCA
CAACAGTGAAAGGAAGAATCCATCTGGCCAGGCTCAGGTGGTTCAAGGCCTTCAGAATCTGCCTTGAGACTCTCACTGG
CTTTAGACTGAAAACCATCTTGGCCCCGTCCATCCGTGTAAGCAATTTAACGACAGCTTGCAAAGCACCGAGCTTTAAC
AGAAAGAAGAGATGAGCACAGCGCAAGAACTTGGACTCCAGAAGAGCTGCCTAACAGATTATTTTTCTGTGGCATTTC
TGAGAACAAACGAAGTAGGAATTTCCCTTTTGTGTTGCTGGCCTTTGGCATCGTTTACTTTCTTTTATTCTCTGAAA
TGTACTTCGAGCCCTGGCAGCATTTCTGTCTCTAAAATCTTATGTCAGAGGTTTATTTTTTTCAGCTTTTCAAATCATATC
TGATAGAGTGAGTGTACTGCCTGGACTCATCACTTTACTTCAGAAGAAATACAGCTCACCTTTAAATGACAATGGTGA
CTGTCCACATCTTTATGTTTTCTACTGAAGTGGCAGGCTTCATTTAAAAATAATGTTTTCCCTCATCAAAGAGAGC
TAGGGTAGAACCGTCAACTCTGCTGTTGTCTGGGTAGTGACCTAACACCCACGTTTTGGACAATCACTCACTGTCTTAT
ATTGGGTTTTTCATTGCATGTAGGATAATTCTTTGTCAATGGTAGTTTTGTCAACCGTGATCTGAGGTAATGAGGTTTT
TACTTTTGCTTGAAATTTTAAAAATATGCAAGCTTTAAACATTT
```

**Fig. S8. Characterization of PIRAT cDNA sequence by RACE PCR.** A) Full-length PIRAT sequence in human monocytes, reconstructed from Rapid Amplification of cDNA Ends (5' and 3') experiments and subsequent full-length PCR amplification and Sanger sequencing.

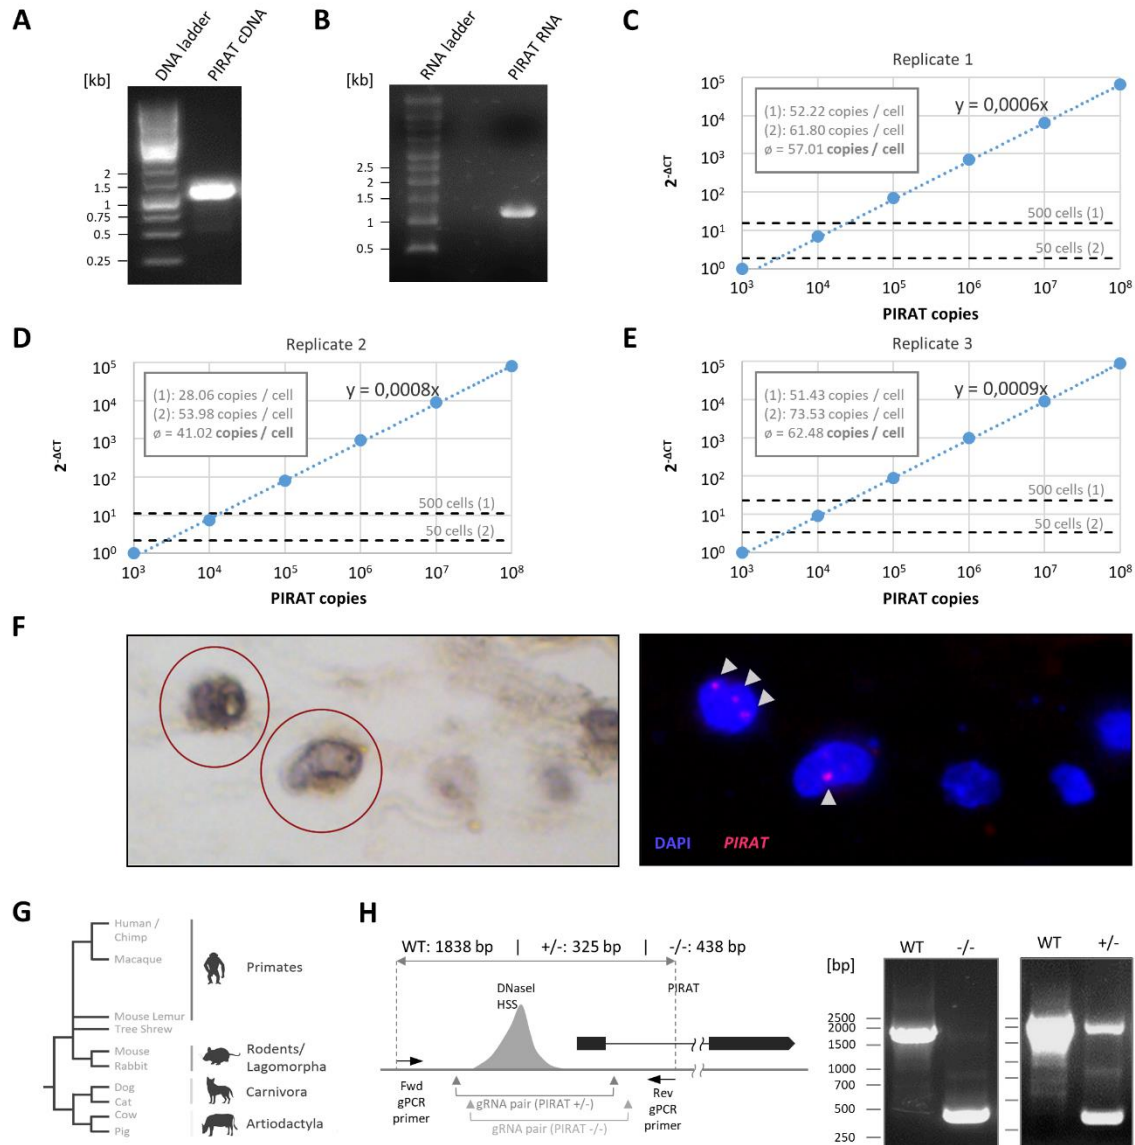

**Fig. S9. Basic properties of lincRNA PIRAT.** A) Full length PIRAT cDNA with 5' T7 promoter (PCR amplicon), separated on TBE agarose gel. Ladder: 1 kb Gene Ruler (Thermo Fisher). B) *In vitro* transcribed, column-purified PIRAT RNA (synthesized using DNA template shown in A), separated on MOPS/formaldehyde agarose gel. Ladder: Millennium RNA marker (Thermo Fisher). C-E) Same as Fig. 4C (PIRAT copy number enumeration by absolute, quantitative PCR), but showing the three independent experimental replicates separately, as well as linear regression formula. F) Left: hematoxylin staining of human lung slice. Circles indicate alveolar phagocytes. Right: RNA-FISH analysis of PIRAT subcellular localization in the same image. Nuclei counterstained with DAPI. White arrows indicate PIRAT signal. G) Phylogenetic relationship of selected mammalian species and their respective orders. H) Left: schematic representation of guideRNA and genomic PCR primer binding sites in the PIRAT (LINC00211) locus. Expected Genomic PCR amplicon sizes for wild-type (WT), monoallelic (+/-) and biallelic knockouts (-/-) are indicated on the top. Right: Agarose gels showing genomic PCR amplicons from wild-type and PIRAT -/- and +/- THP1 cells.

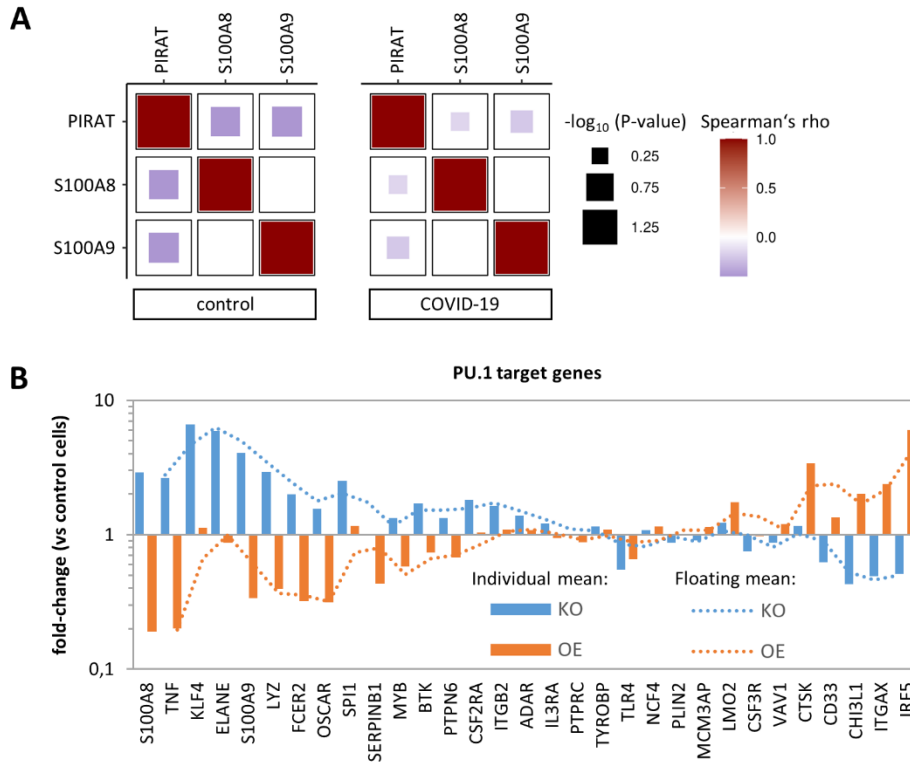

**Fig. S10: Influence of PIRAT on PU.1 target gene expression.** A) Single cell PIRAT, S100A8 and S100A9 co-expression analysis (across all cell types in control and COVID-19 patient scRNA-seq data shown in Fig. 2). Size of the filled squares indicates P-value and color indicates correlation coefficient (Spearman's rho), as indicated in the legends to the right. B) Fold-changes and floating mean of PU.1 target genes in PIRAT knockout (KO) and PIRAT overexpressing (OE), compared to wild-type THP1 cells (RNA-seq experiment from Fig. 4G; experimental replicate values averaged).

**A**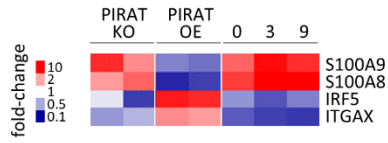**B**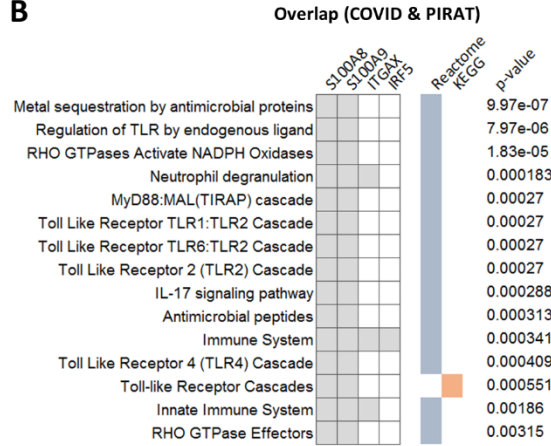**C**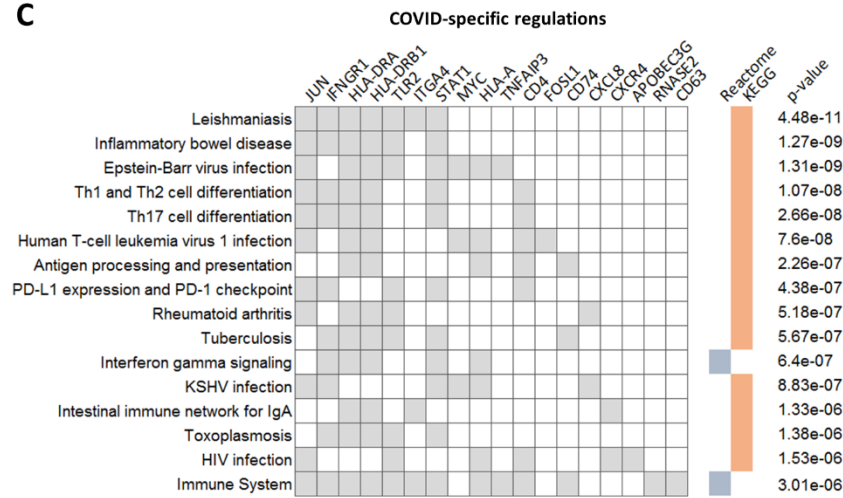**D**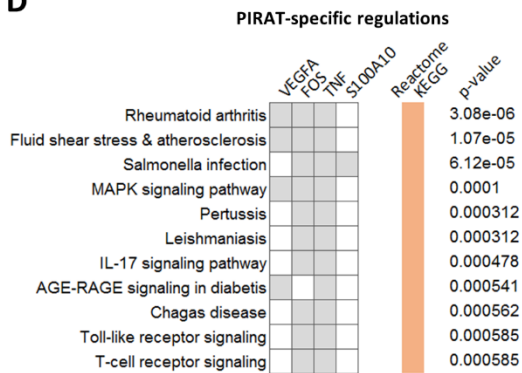**E**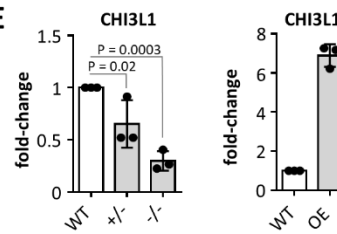**F**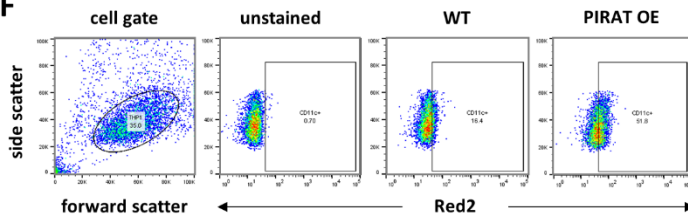**G**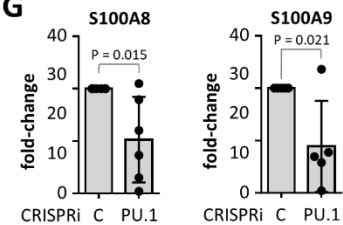

**Fig. S11: Role of PIRAT in human monocytes.** A) Heatmap showing fold-changes of genes regulated by PIRAT (RNA-seq; KO = knockout, OE = overexpression) and in monocyte populations 0, 3 and 9 during COVID-19 (scRNA-seq). Overlap of Venn diagram in Fig. 5A. B) Consensus Path DB KEGG and Reactome pathway analysis of genes regulated in COVID-19 and upon PIRAT expression-manipulation in THP1 cells (overlap of Venn diagram in Fig. 5A). Pathway terms, pertaining genes, pathway sources and p-values are shown. Grey fill color indicates that a given gene is included in the respective pathway. C) Same as B, but for genes regulated in COVID-19 only (Fig. 5A, left circle, without overlap). D) Same as B, but for genes regulated upon PIRAT expression manipulation only (Fig. 5A, right circle, without overlap). E) qRT-PCR analysis of CHI3L1 expression in wild-type and PIRAT-deficient (+/- and -/-), as well as in PIRAT over-expressing (OE) THP1 cells. Mean, individual replicate values and standard deviation based on three independent experiments are shown. One-way ANOVA. F) Representative dot plots illustrating the gating strategy used for FACS-quantification of CD11c (ITGAX) positive THP1 cells (Fig. 5F). G) qRT-PCR analysis of expression changes of S100A8 and S100A9 upon PU.1-compared to control-CRISPRi (THP1 cells.  $\geq 5$  experimental replicates. Replicate values, mean and standard deviation are shown. Two-tailed Student's t-test.).



**A**

**TFs driving genes up-regulated after LUCAT1 knockdown**

| Index | Name           | P-value    | Adjusted p-value | Odds Ratio | Combined score |
|-------|----------------|------------|------------------|------------|----------------|
| 1     | STAT3 CHEA     | 0.00003694 | 0.001773         | 68.34      | 697.48         |
| 2     | IRF1 ENCODE    | 0.004578   | 0.1099           | 25.20      | 135.74         |
| 3     | IRF8 CHEA      | 0.04740    | 0.2018           | 23.66      | 72.14          |
| 4     | ZC3H11A ENCODE | 0.05046    | 0.2018           | 22.17      | 66.21          |
| 5     | ERG CHEA       | 0.05618    | 0.2074           | 19.83      | 57.09          |
| 6     | STAT3 ENCODE   | 0.03178    | 0.2018           | 8.88       | 30.64          |
| 7     | ZNF384 ENCODE  | 0.03218    | 0.2018           | 8.82       | 30.31          |
| 8     | STAT5A ENCODE  | 0.08950    | 0.2685           | 12.17      | 29.37          |
| 9     | GATA1 CHEA     | 0.03873    | 0.2018           | 7.94       | 25.83          |
| 10    | UBTF ENCODE    | 0.02219    | 0.2018           | 6.77       | 25.77          |

**TFs driving genes down-regulated after LUCAT1 knockdown**

| Index | Name           | P-value  | Adjusted p-value | Odds Ratio | Combined score |
|-------|----------------|----------|------------------|------------|----------------|
| 1     | RELA ENCODE    | 0.002450 | 0.1397           | 8.12       | 48.83          |
| 2     | FOSL2 ENCODE   | 0.02289  | 0.5989           | 9.27       | 35.01          |
| 3     | STAT5A ENCODE  | 0.03152  | 0.5989           | 7.77       | 26.86          |
| 4     | KAT2A ENCODE   | 0.1026   | 0.7175           | 9.72       | 22.12          |
| 5     | PPARD CHEA     | 0.04545  | 0.6157           | 6.33       | 19.55          |
| 6     | IRF8 CHEA      | 0.1356   | 0.7175           | 7.19       | 14.37          |
| 7     | BHLHE40 ENCODE | 0.06481  | 0.6157           | 5.16       | 14.11          |
| 8     | ZC3H11A ENCODE | 0.1439   | 0.7175           | 6.74       | 13.07          |
| 9     | CEBPD ENCODE   | 0.05622  | 0.6157           | 3.76       | 10.83          |
| 10    | ESR1 CHEA      | 0.1694   | 0.7175           | 5.63       | 10.00          |

**TFs driving genes up- or down-regulated after PIRAT knockout**

| Index | Name       | P-value | Adjusted p-value | Odds Ratio | Combined score |
|-------|------------|---------|------------------|------------|----------------|
| 1     | IRF8 CHEA  | 0.02398 | 0.09593          | 55.21      | 205.96         |
| 2     | SPI1 CHEA  | 0.1951  | 0.2966           | 5.98       | 9.78           |
| 3     | TP63 CHEA  | 0.2518  | 0.2966           | 4.43       | 6.12           |
| 4     | SUZ12 CHEA | 0.2966  | 0.2966           | 3.63       | 4.41           |

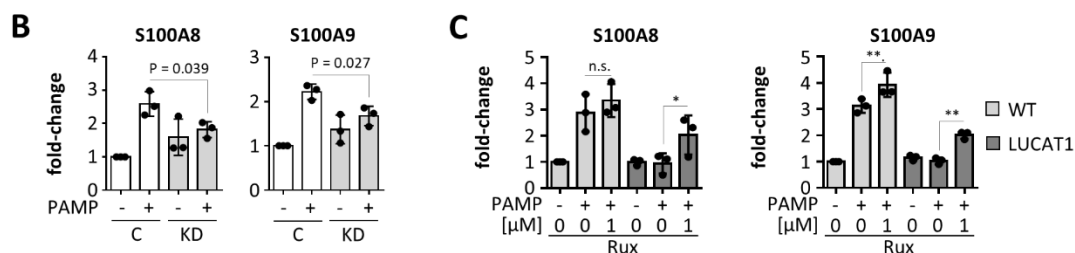

**Fig. S12: Impact of LUCAT1 and PIRAT on genes regulated in monocytes during COVID-19.**

A) Prediction of transcription factors (TFs) driving the indicated sets of genes from Fig. 5H. Predictions were done using the ENCODE and ChEA Consensus TFs tab at Enrichr (<https://maayanlab.cloud/Enrichr/>). Top 10 transcription factors are shown (for the PIRAT controlled gene set only 4 transcription factors were identified). Transcription factor predictions supported by experimental data in the present study are highlighted. B) qRT-PCR analysis of the expression of S100A8 and S100A9 in control (C) and LUCAT1 knockdown (KD) THP1 monocytes, stimulated with LPS + polyI:C (PAMP) for 4 h or left untreated. Results obtained with second knockdown cell line, generated with guideRNA 2 (gRNA2, Table S7). Fold-changes relative to unstimulated control cells. C) Restoration of S100A8/9 expression in LUCAT1 KD cells upon 2 h Ruxolitinib and 4 h LPS + polyI:C treatment. B-C: Three independent replicates, One-way ANOVA. \* =  $P \leq 0.05$ ; \*\* =  $P \leq 0.01$ .

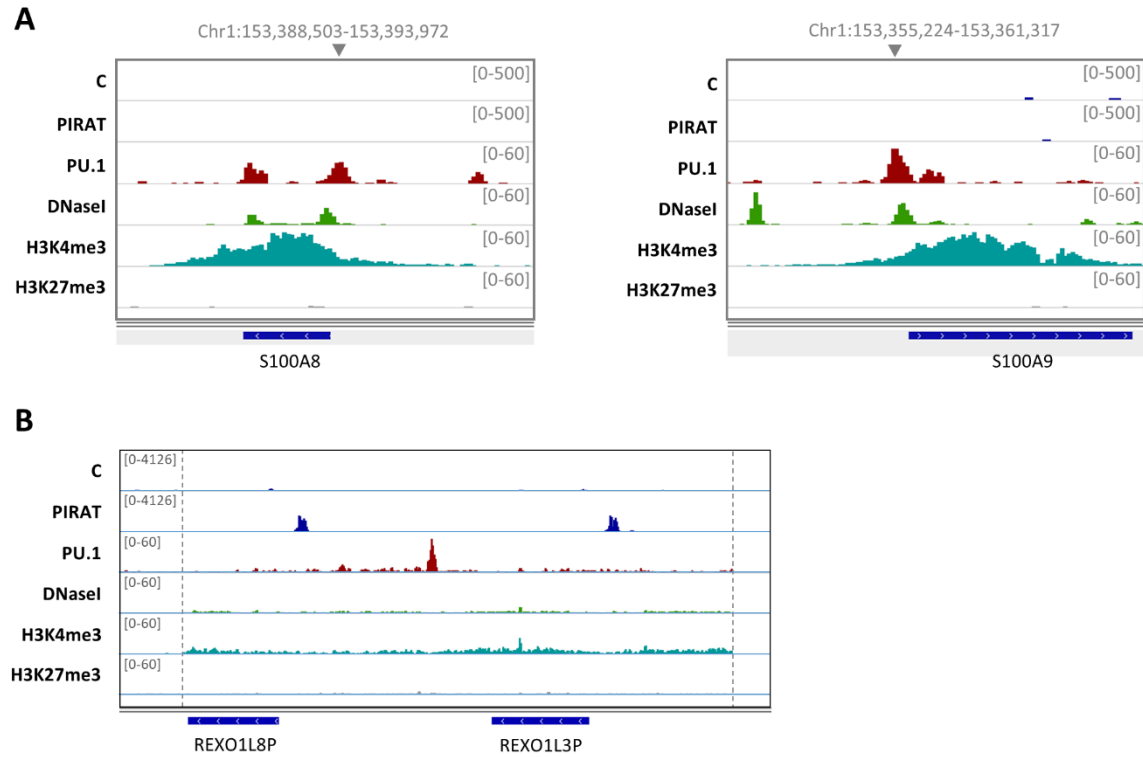

**Fig. S13. Characterization of PIRAT interplay with PU.1 at the DNA level.** A) IGV plots showing PIRAT ChIRP-seq, PU.1 and histone H3 ChIP-seq and DNaseI-seq coverage in the S100A8 and A9 loci. Grey triangles indicate the assumed PU.1 proximal promoter binding sites. Track height is indicated in brackets. **B)** IGV plot showing control (C) and PIRAT ChIRP-seq and matched CD14+ monocyte PU.1 ChIP-, DNaseI-, and histone-3 ChIP-seq coverage in the REXO1L pseudogene locus (**Fig. 6F** zoomed image, spanning REXO1L8P and REXO1L3P). Track-height indicated in brackets.



**Fig. S14: Alignment of REXO1LP sequences.** A) Multiple sequence alignment (<http://multalin.toulouse.inra.fr/multalin/>) of PIRAT binding sites in the REXO1LP locus (peaks from Fig. 6F). B) Same as A, but for PU.1 peaks from Fig. 6F / S13B.



**Fig. S15: Characterization of PIRAT binding sites in the REXO1LP locus.** A) Same as Fig. 6G and H, but with additional primer pairs. B) Enumeration of single nucleotide variants discriminating cloned and Sanger-sequenced PCR amplicons of the PIRAT binding sites amplified using the same primers as in panel A (elution fraction, “LINC”), but with Advantage 2 proof-reading polymerase. % indicates percentage of variant among all Sanger sequences. # indicates the total number a given variant was detected in experiments performed with ChIRP DNA from monocytes isolated from blood samples of three different donors (D1, D2, D3). C) Aligned Sanger sequences from analysis performed in B, with enumerated nucleotide variants highlighted. D) ENSEMBL Genome Browser view of all obtained BLAST hits for Sanger sequences from C (human GRCh38 genome).



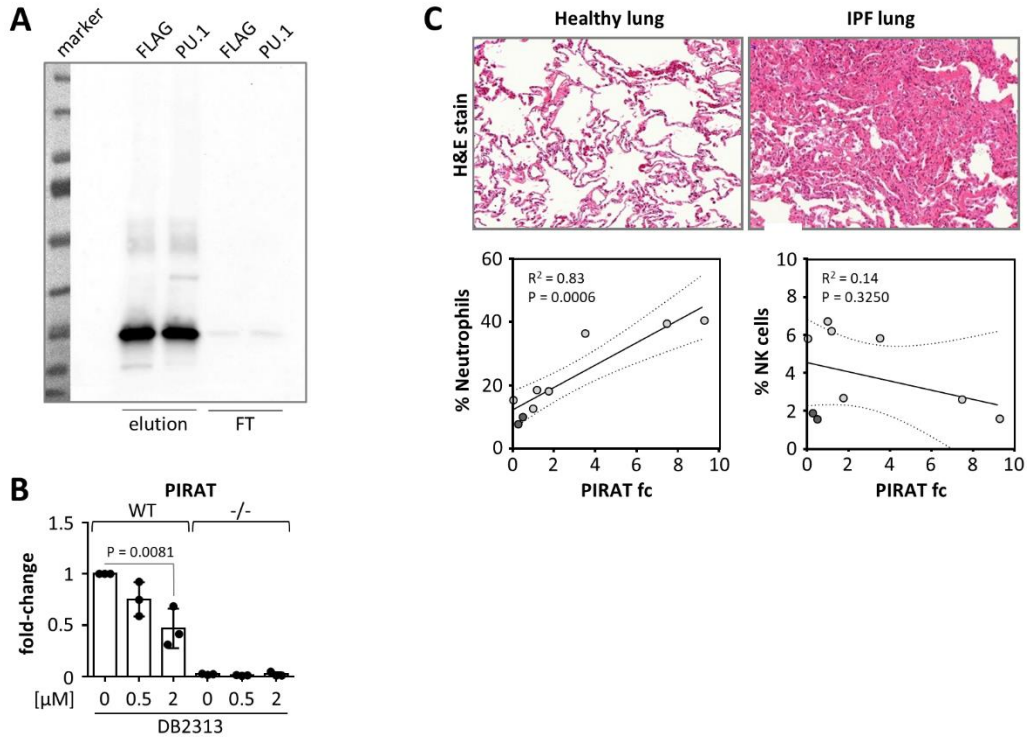

**Fig. S16: PU.1 dependency of PIRAT and relevance to IPF.** A) Full-scan of PU.1 CoIP Western blot shown in Fig. 7A (FT = flow-through fractions). B) qRT-PCR analysis of PIRAT expression after treatment of wild-type (WT) and PIRAT knockout (-/-) THP1 monocytes with the PU.1 inhibitor DB2313 (concentrations indicated) for 4 h. Three independent experiments and One-way ANOVA. C) Top: Representative H&E-stained sections of human healthy and late-stage IPF lung tissue. Bottom: Pearson correlation of neutrophil or NK cell percentage with PIRAT fold-change (compared to IPF lung # 3).

**Table S1.** Myeloid and lymphoid cell specific lincRNAs identified in the current study (RPKM and standard-deviation are shown).

| Alias      | Monocytes   | Granulocytes  | B cells     | NK cells     | CD4 T cells  | CD8 T cells  |
|------------|-------------|---------------|-------------|--------------|--------------|--------------|
| AC064805.1 | 4.58 ± 1.19 | 0.23 ± 0.20   | 0.02 ± 0.03 | 0.09 ± 0.13  | 0.01 ± 0.01  | 0.00 ± 0.00  |
| AP001257.1 | 4.03 ± 1.73 | 0.01 ± 0.02   | 0.02 ± 0.04 | 0.02 ± 0.03  | 0.01 ± 0.02  | 0.03 ± 0.03  |
| AP003774.3 | 3.92 ± 1.83 | 0.06 ± 0.10   | 0.02 ± 0.04 | 0.04 ± 0.07  | 0.01 ± 0.01  | 0.01 ± 0.01  |
| LINC02285  | 3.69 ± 0.65 | 2.11 ± 1.06   | 1.20 ± 0.44 | 1.62 ± 0.56  | 0.92 ± 0.18  | 1.25 ± 0.19  |
| AC097504.2 | 3.53 ± 0.45 | 0.00 ± 0.00   | 0.00 ± 0.00 | 0.00 ± 0.00  | 0.00 ± 0.00  | 0.00 ± 0.00  |
| LUCAT1     | 2.49 ± 1.62 | 23.97 ± 15.61 | 0.02 ± 0.01 | 0.03 ± 0.02  | 0.02 ± 0.02  | 0.03 ± 0.03  |
| LINC01506  | 0.57 ± 0.09 | 9.27 ± 2.93   | 0.03 ± 0.01 | 0.00 ± 0.00  | 0.00 ± 0.00  | 0.00 ± 0.00  |
| AC007342.5 | 0.04 ± 0.05 | 8.38 ± 1.80   | 0.01 ± 0.02 | 0.00 ± 0.00  | 1.18 ± 0.67  | 1.27 ± 0.66  |
| PIRAT      | 0.71 ± 0.47 | 4.63 ± 1.46   | 0.00 ± 0.00 | 0.04 ± 0.04  | 0.02 ± 0.03  | 0.02 ± 0.03  |
| LINC00921  | 0.52 ± 0.24 | 3.96 ± 1.01   | 0.14 ± 0.15 | 1.24 ± 1.30  | 0.33 ± 0.26  | 0.30 ± 0.29  |
| AC104971.4 | 0.06 ± 0.11 | 0.00 ± 0.00   | 7.52 ± 0.22 | 0.04 ± 0.04  | 0.50 ± 0.20  | 0.23 ± 0.20  |
| AC009686.2 | 0.00 ± 0.00 | 0.00 ± 0.00   | 5.18 ± 1.64 | 0.16 ± 0.28  | 0.16 ± 0.15  | 0.37 ± 0.30  |
| AC006033.2 | 1.17 ± 0.11 | 0.10 ± 0.01   | 0.02 ± 0.04 | 9.40 ± 1.20  | 0.02 ± 0.02  | 0.63 ± 0.22  |
| AC093323.2 | 0.16 ± 0.25 | 0.17 ± 0.10   | 0.06 ± 0.04 | 6.48 ± 1.97  | 1.35 ± 0.81  | 2.60 ± 1.17  |
| LINC00861  | 0.21 ± 0.34 | 0.08 ± 0.13   | 0.05 ± 0.07 | 10.34 ± 5.29 | 10.49 ± 3.64 | 9.21 ± 2.00  |
| LINC01550  | 0.03 ± 0.05 | 0.01 ± 0.02   | 0.00 ± 0.00 | 0.02 ± 0.01  | 2.20 ± 0.52  | 1.97 ± 0.21  |
| LINC02295  | 0.00 ± 0.00 | 0.00 ± 0.00   | 0.00 ± 0.00 | 0.00 ± 0.00  | 0.81 ± 0.90  | 0.46 ± 0.28  |
| LINC02361  | 0.72 ± 0.25 | 0.48 ± 0.28   | 0.61 ± 0.43 | 2.30 ± 0.29  | 9.96 ± 3.44  | 5.83 ± 1.50  |
| LINC02273  | 0.03 ± 0.05 | 0.01 ± 0.02   | 0.06 ± 0.02 | 0.27 ± 0.05  | 5.50 ± 0.67  | 3.01 ± 1.35  |
| LINC02446  | 0.15 ± 0.26 | 0.02 ± 0.02   | 0.01 ± 0.01 | 0.40 ± 0.36  | 0.04 ± 0.05  | 15.72 ± 7.31 |



**Table S2.** COVID patient characteristics (cohort 1). Red: patient PBMCs analyzed by single cell RNA-seq.

| Patient Nr. | Gender | Age | Patient group (WHO grade) |
|-------------|--------|-----|---------------------------|
| 1           | Female | 68  | Control                   |
| 2           | Female | 46  | Control                   |
| 3           | Male   | 92  | Control                   |
| 4           | Female | 47  | Control                   |
| 5           | Male   | 74  | Control                   |
| 6           | Male   | 65  | Control                   |
| 7           | Male   | 68  | Control                   |
| 8           | Male   | 83  | COVID-19 (> 4)            |
| 9           | Male   | 88  | COVID-19 (> 4)            |
| 10          | Male   | 78  | COVID-19 (3)              |
| 11          | Female | 72  | COVID-19 (8)              |
| 12          | Male   | 70  | COVID-19 (8)              |
| 13          | Male   | 49  | COVID-19 (8)              |
| 14          | Female | 52  | COVID-19 (5)              |
| 15          | Male   | 55  | COVID-19 (4)              |
| 16          | Male   | 59  | COVID-19 (4)              |
| 17          | Female | 42  | COVID-19 (2)              |
| 18          | Female | 71  | COVID-19 (4)              |
| 19          | Male   | 55  | COVID-19 (4)              |

**Table S3.** COVID patient characteristics (cohort 2). ICU = intensive care unit.

| <b>Patient Nr.</b> | <b>Gender</b> | <b>Age</b> | <b>Patient group<br/>(intensive care unit)</b> |
|--------------------|---------------|------------|------------------------------------------------|
| 1                  | Female        | 86         | Control                                        |
| 2                  | Female        | 65         | Control                                        |
| 3                  | Male          | 44         | Control                                        |
| 4                  | Male          | 42         | Control                                        |
| 5                  | Female        | 80         | Control                                        |
| 6                  | Female        | 72         | Control                                        |
| 7                  | Female        | 26         | Control                                        |
| 8                  | Male          | 41         | Control                                        |
| 9                  | Male          | 28         | Control                                        |
| 10                 | Male          | 70         | Control                                        |
| 11                 | Male          | 28         | Control                                        |
| 12                 | Male          | 82         | COVID-19 (ICU)                                 |
| 13                 | Female        | 58         | COVID-19                                       |
| 14                 | Male          | 52         | COVID-19                                       |
| 15                 | Male          | 44         | COVID-19 (ICU)                                 |
| 16                 | Male          | 66         | COVID-19 (ICU)                                 |
| 17                 | Male          | 23         | COVID-19 (ICU)                                 |
| 18                 | Male          | 82         | COVID-19 (ICU)                                 |

**Table S4.** List of direct PU.1 target genes.

| <b>Gene ID</b>  | <b>Name</b> |
|-----------------|-------------|
| ENSG00000140678 | ITGAX       |
| ENSG00000160255 | ITGB2       |
| ENSG00000011600 | TYROBP      |
| ENSG00000066336 | SPI1        |
| ENSG00000147872 | PLIN2       |
| ENSG00000111679 | PTPN6       |
| ENSG00000104921 | FCER2       |
| ENSG00000232810 | TNF         |
| ENSG00000128604 | IRF5        |
| ENSG00000170909 | OSCAR       |
| ENSG00000160294 | MCM3AP      |
| ENSG00000185291 | IL3RA       |
| ENSG00000143387 | CTSK        |
| ENSG00000136826 | KLF4        |
| ENSG00000135363 | LMO2        |
| ENSG00000136869 | TLR4        |
| ENSG00000105383 | CD33        |
| ENSG00000021355 | SERPINB1    |
| ENSG00000105810 | CDK6        |
| ENSG00000150337 | FCGR1A      |
| ENSG00000119535 | CSF3R       |
| ENSG00000198223 | CSF2RA      |
| ENSG00000163220 | S100A9      |
| ENSG00000143546 | S100A8      |
| ENSG00000118513 | MYB         |
| ENSG00000090382 | LYZ         |

**Table S5.** Significant PIRAT ChIRP-seq peaks. Chr = chromosome. GRCh38 genome.

| Chr | Region              | Peak end  | Peak center | Peak length | Peak shape score | P-value  | Nearest gene                 |
|-----|---------------------|-----------|-------------|-------------|------------------|----------|------------------------------|
| 8   | 85723057-85723461   | 85723461  | 85723258    | 405         | 9.742            | 9.98E-23 | REXO1L2P                     |
| 8   | 85807151-85807553   | 85807553  | 85807353    | 403         | 9.571            | 5.30E-22 | REXO1L4P                     |
| 8   | 85794959-85795360   | 85795360  | 85795160    | 402         | 9.484            | 1.22E-21 | AC232323.1                   |
| 8   | 85647089-85647497   | 85647497  | 85647297    | 409         | 8.983            | 1.31E-19 | REXO1L8P                     |
| 8   | 85659279-85659686   | 85659686  | 85659486    | 408         | 8.966            | 1.54E-19 | REXO1L1P                     |
| 8   | 85819338-85819739   | 85819739  | 85819539    | 402         | 8.959            | 1.64E-19 | REXO1L5P                     |
| 8   | 85755321-85755750   | 85755750  | 85755550    | 430         | 7.471            | 3.98E-14 | REXO1L10P                    |
| 8   | 85767511-85767922   | 85767922  | 85767722    | 412         | 7.150            | 4.34E-13 | REXO1L9P                     |
| 8   | 85782785-85783198   | 85783198  | 85782998    | 414         | 7.108            | 5.89E-13 | REXO1L2P                     |
| 13  | 113079768-113080178 | 113080178 | 113079969   | 411         | 6.610            | 1.92E-11 | MCF2L                        |
| 8   | 85729231-85729637   | 85729637  | 85729437    | 407         | 6.185            | 3.10E-10 | REXO1L11P                    |
| 8   | 85726132-85726551   | 85726551  | 85726351    | 420         | 6.062            | 6.71E-10 | REXO1L11P                    |
| 8   | 85732308-85732721   | 85732721  | 85732521    | 414         | 6.020            | 8.70E-10 | REXO1L11P                    |
| 8   | 85752207-85752609   | 85752609  | 85752408    | 403         | 5.965            | 1.22E-09 | REXO1L10P                    |
| 8   | 85779682-85780091   | 85780091  | 85779883    | 410         | 5.909            | 1.71E-09 | REXO1L2P                     |
| 8   | 85749126-85749545   | 85749545  | 85749327    | 420         | 5.827            | 2.81E-09 | REXO1L10P                    |
| 14  | 105702998-105703418 | 105703418 | 105703218   | 421         | 5.260            | 7.19E-08 | ELK2AP                       |
| 16  | 33338417-33338820   | 33338820  | 33338620    | 404         | 4.856            | 5.98E-07 | AC141257.2                   |
| 16  | 33339241-33339719   | 33339719  | 33339519    | 479         | 4.415            | 5.04E-06 | AC141257.3                   |
| 16  | 33336089-33336575   | 33336575  | 33336290    | 487         | 4.297            | 8.63E-06 | AC141257.2                   |
| 16  | 33491258-33491859   | 33491859  | 33491459    | 602         | 3.659            | 0.00012  | AC136944.5                   |
| 16  | 33337166-33337581   | 33337581  | 33337367    | 416         | 3.598            | 0.00016  | AC141257.3                   |
| 16  | 33337588-33338034   | 33338034  | 33337789    | 447         | 3.590            | 0.00016  | AC141257.3                   |
| 1   | 125182192-125182673 | 125182673 | 125182393   | 482         | 3.589            | 0.00016  | No annotations<br>(Chr 1q12) |
| 2   | 37827524-37827925   | 37827925  | 37827725    | 402         | 3.490            | 0.00024  | PIRAT                        |
| 1   | 143193471-143193932 | 143193932 | 143193732   | 462         | 3.452            | 0.00027  | TMEM128                      |
| 1   | 143262376-143262850 | 143262850 | 143262650   | 475         | 3.419            | 0.00031  | TMEM128                      |
| 11  | 69872120-69872630   | 69872630  | 69872430    | 511         | 3.340            | 0.00041  | FGF3                         |
| 1   | 125179028-125179431 | 125179431 | 125179229   | 404         | 3.184            | 0.00072  | No annotations<br>(Chr 1q12) |
| 12  | 124914336-124914767 | 124914767 | 124914567   | 432         | 3.042            | 0.00117  | No annotations<br>(Chr 1q12) |
| 3   | 93470371-93470773   | 93470773  | 93470573    | 403         | 3.026            | 0.00123  | REXO1L2P                     |
| 8   | 85723057-85723461   | 85723461  | 85723258    | 405         | 9.742            | 9.98E-23 | REXO1L4P                     |

**Table S6.** Characteristics of control and pulmonary infection patients. n.d. = causative pathogen not determined.

| <b>Patient Nr.</b> | <b>Gender</b> | <b>Age</b> | <b>Patient group<br/>(type of infection)</b> |
|--------------------|---------------|------------|----------------------------------------------|
| 1                  | male          | 53         | control                                      |
| 2                  | male          | 49         | control                                      |
| 3                  | male          | 38         | control                                      |
| 4                  | female        | 71         | control                                      |
| 5                  | female        | 49         | control                                      |
| 6                  | male          | 62         | control                                      |
| 7                  | male          | 28         | control                                      |
| 8                  | male          | 29         | control                                      |
| 9                  | female        | 27         | control                                      |
| 10                 | male          | 64         | control                                      |
| 11                 | female        | 25         | infection (bacterial)                        |
| 12                 | male          | 45         | infection (bacterial)                        |
| 13                 | female        | 64         | infection (bacterial)                        |
| 14                 | female        | 19         | infection (fungal)                           |
| 15                 | female        | 64         | infection (fungal)                           |
| 16                 | female        | 42         | infection (fungal)                           |
| 17                 | female        | 68         | infection (n.d.)                             |
| 18                 | female        | 59         | infection (n.d.)                             |
| 19                 | female        | 52         | infection (n.d.)                             |
| 20                 | female        | 58         | infection (n.d.)                             |
| 21                 | female        | 73         | infection (n.d.)                             |
| 22                 | female        | 61         | infection<br>(polymicrobial)                 |

**Table S7.** PCR and sequencing oligonucleotides used in the present study.

| Target (purpose)              | Oligo name | Oligo sequence               |
|-------------------------------|------------|------------------------------|
| SparQ MCS (Sanger sequencing) | OBS-0659   | Fwd: AGGAGGATTTGATATTCACCTG  |
|                               | OBS-0660   | Rev: ACCTTCTCTAGGCACCCG      |
| pX458 (Sanger sequencing)     | OBS-0842   | Fwd: CTGGCCTTTTGCTCACATGT    |
|                               | OBS-0843   | Rev: GTCTGCAGAATTGGCGCAC     |
| hPIRAT (qRT-PCR)              | OBS-0808   | Fwd: TGAGTGTACTGCCTGGACTCATC |
|                               | OBS-0809   | Rev: TAAATGAAGCCTGCCACTTCAG  |
| hLUCAT1 (qRT-PCR)             | OBS-0849   | Fwd: ACCATGTGTCAAGCTCGGATTG  |
|                               | OBS-0850   | Rev: TTGTGGTCTCTGGTGCCAAG    |
| AC064805.1 (qRT-PCR)          | OBS-0899   | Fwd: TAATAAGCAGCAATTGCAGTTCC |
|                               | OBS-0900   | Rev: TATCTGCTCCTGAGGCAGAGG   |
| LINC02295 (qRT-PCR)           | OBS-0935   | Fwd: AAGCTGTGGCTGTTGTGACG    |
|                               | OBS-0936   | Rev: ACACTTGTCTCAGTAGGCCTGG  |
| LINC02446 (qRT-PCR)           | OBS-0937   | Fwd: TGTCACCTGTGGACAACCTGC   |
|                               | OBS-0938   | Rev: TTATCTTGACCAGGTGCGAGAC  |
| LINC00861 (qRT-PCR)           | OBS-0907   | Fwd: AACACTGAGCAATCCTGACCTG  |
|                               | OBS-0908   | Rev: TATCGGTCCTCCACTCTTGTTCC |
| hS100A8 (qRT-PCR)             | OBS-2077   | Fwd: AGACTGTAGCAACTCTGGCAG   |
|                               | OBS-2078   | Rev: TCCAGCTCGGTCAACATGATG   |
| hS100A9 (qRT-PCR)             | OBS-2198   | Fwd: ACCAATACTCTGTGAAGCTGG   |
|                               | OBS-2199   | Rev: TCCTCGAAGCTCAGCTGCTTG   |
| hIRF5 (qRT-PCR)               | OBS-3742   | Fwd: ATGCCACAAGGCATGGTCC     |
|                               | OBS-3743   | Rev: TCGTAGATGAGGCGGAAGTC    |
| hCHI3L1 (qRT-PCR)             | OBS-2179   | Fwd: AGGGACCCTTGCCTACTATGA   |
|                               | OBS-2180   | Rev: TGGAAGTCATCCAGGTCCAGG   |
| hITGAX (qRT-PCR)              | OBS-2275   | Fwd: AAGCTGACAGACGTGGTCATC   |
|                               | OBS-2276   | Rev: ATACTGCAGCCTGGAGGAGAG   |
| hCXCL2 (qRT-PCR)              | OBS-534    | Fwd: CCTGCAGGGAATTCACCTCA    |
|                               | OBS-535    | Rev: CCTTCCTTCTGGTCAGTTGG    |
| hCXCR4 (qRT-PCR)              | OBS-3512   | Fwd: AGAACCAGCGTTACCATGG     |
|                               | OBS-3513   | Rev: TGACCAGGATGACCAATCCATTG |
| hNAMPT (qRT-PCR)              | OBS-1458   | Fwd: GGTTACAAGTTGCTGCCACC    |
|                               | OBS-1459   | Rev: AGCAAACCTCCACCAGAACC    |

|                                        |          |                                                        |
|----------------------------------------|----------|--------------------------------------------------------|
| hCXCL8 (qRT-PCR)                       | OBS-0017 | Fwd: ACTGAGAGTGATTGAGAGTGGAC                           |
|                                        | OBS-0018 | Rev: AACCCCTCTGCACCCAGTTTTTC                           |
| hIL6 (qRT-PCR)                         | OBS-15   | Fwd: AATTCGGTACATCCTCGACGG                             |
|                                        | OBS-16   | Rev: TTGGAAGGTTTCAGGTTGTTTTCT                          |
| hPU.1 (qRT-PCR)                        | OBS-2399 | Fwd: AGAGCCATAGCGACCATTACTG                            |
|                                        | OBS-2400 | Rev: ATCTGCTCCAGCTCCATGTG                              |
| hGAPDH (qRT-PCR)                       | OBS-0430 | Fwd: CCACATCGCTCAGACACCAT                              |
|                                        | OBS-0431 | Rev: CGCAACAATATCCACTTTACCAGAG                         |
| hMALAT1 (qRT-PCR)                      | OBS-814  | Fwd: AGGTGCTACACAGAAGTGGATTGAG                         |
|                                        | OBS-815  | Rev: CTTCCCGTACTTCTGTCTTCCAGT                          |
| hU6 (qRT-PCR)                          | OBS-0712 | Fwd: GCTTCGGCAGCACATATACTAAAAT                         |
|                                        | OBS-0713 | Rev: ATATGGAACGCTTCACGAATTTG                           |
| hS100A8 promoter (qRT-PCR)             | OBS-3211 | Fwd: AGCATCCACTTCCTATTCTCTGC                           |
|                                        | OBS-3212 | Rev: TAAGGATTTGGGTAGCATGGAGG                           |
| hS100A9 promoter (qRT-PCR)             | OBS-3213 | Fwd: TGAACTAAACAACCAGCTTCCTCC                          |
|                                        | OBS-3214 | Rev: TGAGCAGTGTGGTAATGCTGC                             |
| hREXOL1P PIRAT peak primer 1 (qRT-PCR) | OBS-3215 | Fwd: ACAGTGAGTTGGTCAAATGCTCC                           |
|                                        | OBS-3216 | Rev: ACAGCATAGGTTGAGAAGCTGTTAC                         |
| hREXOL1P PIRAT peak primer 2 (qRT-PCR) | OBS-3221 | Fwd: TTCTCCACACTGTCAGGAGC                              |
|                                        | OBS-3222 | Rev: AGGTGTAGGAAGCCATACACTG                            |
| hREXOL1P PIRAT peak primer 3 (qRT-PCR) | OBS-3734 | Fwd: CAACAGGCCTCCAGAGAAC                               |
|                                        | OBS-3222 | Rev: AGGTGTAGGAAGCCATACACTG                            |
| hREXOL1P PU.1 peak primer 1 (qRT-PCR)  | OBS-3202 | Fwd: CCACAGCCAATATCATACTGAATGG                         |
|                                        | OBS-3203 | Rev: ACAAACAGGGACAATTTGACTTCCTC                        |
| hREXOL1P PU.1 peak primer 2 (qRT-PCR)  | OBS-3204 | Fwd: GCTGAAGTTGCTTATCAGCTTAAGG                         |
|                                        | OBS-3205 | Rev: ACATAGTGTGGAACCTTCTGGCC                           |
| hPIRAT (genomic PCR)                   | OBS-1895 | Fwd: GCATCTGCATGGCAGAGTTC                              |
|                                        | OBS-1239 | Rev: TATGGCTCTTGAATTAATCCTG                            |
| hPIRAT 3' (RACE)                       | OBS-1058 | AGAGTGAGTGTACTGCCTGGACTCATCAC                          |
| hPIRAT 5' (RACE)                       | OBS-1059 | ACATAAAGATGTGGACAGTCACCATTGTC                          |
| hPIRAT (FL cloning)                    | OBS-1356 | Fwd: atcggaTTCGAAGAGGAACAGTCTTACTCTGTCC                |
|                                        | OBS-1357 | Rev: tccgatGCGGCCGCAATGTTTTAAAGCTTGCATATTTTC           |
| hPIRAT (in vitro transcription PCR)    | OBS-1898 | Fwd: GTTTTTTTTTAATACGACTCACTATAGGAGGAACAGTCTTACTCTGTCC |
|                                        | OBS-1899 | Rev: AAATGTTTTAAAGCTTGCATATTTTC                        |
| hPIRAT (gRNA +/-)                      | LS-1     | Sense strand: GATGAGTCTAACGTGCACCC                     |

|                                        |          |                                              |
|----------------------------------------|----------|----------------------------------------------|
|                                        | LS-2     | Antisense strand: GAGAGTTATAACATAATGGT       |
| hPIRAT (gRNA +/-)                      | LS-3     | Sense strand: ACGGATGGCCTTGGTACCC            |
|                                        | LS-4     | Antisense strand: TTACATGAATAGACAGCTAG       |
| hLUCAT1 (gRNA 1)                       | OBS-2092 | Sense strand: CACCGAAGCTCGGATTGCCTTAGAC      |
|                                        | OBS-2093 | Antisense strand: AAACGTCTAAGGCAATCCGAGCTTC  |
| hLUCAT1 (gRNA 2,<br>partial knockdown) | OBS-2094 | Sense strand: CACCGCGAGCTTGACACATGGTTTC      |
|                                        | OBS-2095 | Antisense strand: AAACGAAACCATGTGTCAAGCTCGC  |
| hPU.1 (gRNA)                           | OBS-2281 | Sense strand: CACCGAAATCTCTTGCGCTACATAC      |
|                                        | OBS-2282 | Antisense strand: AAACGTATGTAGCGCAAGAGATTTTC |



**Table S8.** Antibodies used in the present study.

| <b>Specificity</b> | <b>Source</b> | <b>Class</b> | <b>Conjugate</b> | <b>Supplier</b> | <b>Catalog nr.</b> | <b>Application</b> |
|--------------------|---------------|--------------|------------------|-----------------|--------------------|--------------------|
| PU.1 (A7)          | mouse         | IgG1         | -                | Santa Cruz      | sc-365208          | Western Blot, IP   |
| PU.1 (C3)          | mouse         | IgG          | -                | Santa Cruz      | sc-390405          | IP                 |
| Flag               | mouse         | IgM2         | -                | Sigma-Aldrich   | F1804              | IP                 |
| Anti-mouse         | goat          | IgG          | HRP              | Santa Cruz      | sc-2005            | Western Blot       |
| CD14               | mouse         | IgG1         | FITC             | eBioscience     | 11-0149-42         | FACS               |
| CD66b              | mouse         | IgM          | APC              | eBioscience     | 17-0666-42         | FACS               |
| CD4                | mouse         | IgG2b        | PE               | eBioscience     | 12-0048-41         | FACS               |
| CD8                | mouse         | IgG1         | FITC             | eBioscience     | 11-0087-42         | FACS               |
| CD19               | mouse         | IgG1         | FITC             | eBioscience     | 11-0199-41         | FACS               |
| CD56               | mouse         | IgG          | APC              | eBioscience     | 17-0567-41         | FACS               |
| CD11c              | mouse         | IgG1         | APC              | eBioscience     | 17-0116-42         | FACS               |

**Table S9.** ChIRP oligonucleotides used in the present study.

| <b>Target (purpose)</b> | <b>Oligo name</b> | <b>Oligo sequence</b> |
|-------------------------|-------------------|-----------------------|
| PIRAT                   | OBS-2890          | TCCAATTAGCCAAGAGCATG  |
| PIRAT                   | OBS-2891          | CTTTCAGTGTGTGACCATT   |
| PIRAT                   | OBS-2892          | GTTTTCAGTCTAAAGCCAGT  |
| PIRAT                   | OBS-2893          | CTCATCTCTTCTTTCTGTTA  |
| PIRAT                   | OBS-2894          | ATGCCAAAGGCCAGACAAAC  |
| PIRAT                   | OBS-2895          | AAAGTGATGAGTCCAGGCAG  |
| PIRAT                   | OBS-2896          | CTGCCACTTCAGTGTAGAAA  |
| PIRAT                   | OBS-2897          | TGTCCAAAACGTGGGTGTTA  |
| PIRAT                   | OBS-2898          | ATTACCTCAGATCACGGTTG  |
| None (control ChIRP)    | OBS-2899          | CACTATGGAAAGGCGGCTTC  |
| None (control ChIRP)    | OBS-2900          | GATTTCCGGTCTGTACGGCTA |
| None (control ChIRP)    | OBS-2901          | TTACATGGTCCTAATCGGCT  |
| None (control ChIRP)    | OBS-2902          | GCTGTTACCTTCCACGCCGG  |
| None (control ChIRP)    | OBS-2903          | ATACGATCGGACAGCCTTGT  |
| None (control ChIRP)    | OBS-2904          | TGCACAATTGATGTTCCGAT  |
| None (control ChIRP)    | OBS-2905          | GACGCCTAGACGTATACTAG  |
| None (control ChIRP)    | OBS-2906          | GTGTGTGCTATTAGAAGCGG  |
| None (control ChIRP)    | OBS-2907          | AAGCGACCCTGACAGTGCGA  |
| None (control ChIRP)    | OBS-2908          | AGCAAACACGTGAGCAAAT   |

## Supplementary Methods

### *Cell culture and human biomaterial*

Human peripheral blood mononuclear cells from healthy donors (control patient cells see below) were isolated from buffy coats (transfusion medicine department, UKGM Giessen). Buffy coats were de-identified prior to further use. Leukocyte populations were purified from buffy coats using Lymphoprep gradient medium (Stemcell Technologies) and MACS-purification (Miltenyi CD14-, CD4-, CD8-, CD45RO-, CD19-, CD56- and CD66b-beads). CD4 and CD8 T-cells were separated into CD45RO-positive and -negative populations, respectively. Blood-derived macrophages and dendritic cells were obtained by cultivating monocytes in the presence of 100 ng / ml GM-CSF or 50 ng / ml GM-CSF, 20 ng / ml IL-4 (Preprotech), respectively, in X-Vivo 15 medium (Lonza), containing 5 % fetal calf serum (FCS, Biochrom) for 7 days. Cell populations shown in Fig. 2H were isolated by cell sorting of gradient-purified leukocytes according to the following surface markers. Plasmacytoid DCs: CD19-, CD3-, CD56-, HLA-DR+, CD11C-, CD14-, CD16-, CD304+. Myeloid DCs: CD19-, CD3-, CD56-, HLA-DR+, CD11C+, CD14-, CD16-, CD1c/CD141+/- . Classical monocytes: CD19-, CD3-, CD56-, HLA-DR+, CD11C+, CD14+, CD16- . Non-classical monocytes: CD19-, CD3-, CD56-, HLA-DR+, CD11C+, CD14lo, CD16+. THP1 and Hek293T cells were purchased from ATCC and cultured in RPMI 1640 (Thermo Fisher), 10 % FCS, 1% penicillin/streptomycin solution (Thermo Fisher). For BAY-11-7082 (NFκB inhibitor) and Ruxolitinib (JAK-STAT inhibitor) treatments, cells were pre-stimulated with the respective inhibitor or DMSO for 2 h prior to further stimulations. For PU.1 inhibition, cells were incubated with the inhibitor DB2313 (MedChemExpress) or DMSO for 4 h, followed by further sample processing. Cells were cultured at a density of 1 million cells per 2 ml culture medium in 6-well dishes or with evenly adjusted cell number and medium volume for smaller dishes. In all experiments, LPS was used at a concentration of 100 ng / ml, polyI:C at 10 µg / ml and Pam3CSK4 at 200 ng / ml. All cells were cultured at 37 °C in a humidified atmosphere with 5 % CO<sub>2</sub>.

Patients suffering from SARS-CoV-2-infection were recruited after hospitalization. In addition, healthy subjects were recruited (Table S2 and 3). All COVID-19 patients were tested positive for SARS-CoV-2 RNA in nasopharyngeal swabs and graded to have mild (WHO 2-4) or severe (5-7) disease according to the WHO clinical ordinal scale. Immunosuppressed, pregnant and HIV-positive patients were excluded from the study. The Biolnflame study was approved by the ethics committee of the Charité - Universitätsmedizin Berlin (EA2/030/09) and the University Medical Center Marburg (55/17). All blood donors were at least 18 years of age and provided written informed consent for use of their blood samples for scientific purposes. PBMCs were isolated by Pancoll gradient centrifugation of one collected Vacutainer EDTA-tube (6 ml whole blood). All methods were performed in accordance with the relevant guidelines and regulations.

Bronchoalveolar lavage (BAL) fluid (BALF) (Fig. 7F) was obtained at the University Clinics Giessen and Marburg (UKGM) (American Thoracic Society consensus procedure), on approval by the ethics committee (Marburg: 87/12). Late stage IPF tissue was obtained from the UGMLC Giessen Biobank/euIPF registry biobank, member of the DZL Platform Biobanking, on approval by ethics committee (Az 58/15 and 111/08). The patients have been informed and given their written consent for the use of biospecimen for research purposes. Tissue was flushed with pre-warmed PBS. Obtained cells were analysed immediately. Further BALF (Fig. 7F) was obtained from patients at the Department of Infectious Diseases and Respiratory Medicine, Charité, Berlin. All patients underwent bronchoscopy including BAL on clinical indication and had provided oral and written informed consent. The study was approved by the local ethics committee (EA2/086/16). BAL was performed by instillation of 150 ml pre-warmed sterile 0.9% NaCl solution. In patients with focal abnormalities in chest imaging, BAL was performed in the corresponding pulmonary segment; in patients without radiological abnormalities or diffuse infiltrates, BAL was performed in the right middle lobe or lingula. Diagnosis of infection was made by a board-certified pulmonologist based on chest imaging, clinical signs of infection, culture and laboratory results, BALF cellular analysis and response to therapy. For the infection group, patients with non-mycobacterial infection were selected. Control patients showed no apparent lung disease and underwent bronchoscopy and BAL as part of rule-out diagnostics due to idiopathic coughing, for exclusion of pulmonary

involvement of systemic disease (e.g. rheumatoid arthritis) or for exclusion of pulmonary tuberculosis. No obvious abnormalities in chest imaging and BALF composition were detected in these patients. Patient characteristics are listed in Table S6. All studies and procedures to obtain human specimen were conducted according to the Declaration of Helsinki.

### *CRISPR/Cas9*

PIRAT-deficient cells were generated by CRISPR/Cas9, as recently described (1), using independent gRNAs and the pX458 vector system (Fig. S9H). Control cells were generated using a pX458 vector with scrambled gRNA. For PU.1 and LUCAT1 silencing, a lentiviral CRISPR interference vector (2) was used (Addgene #71237). gRNAs targeting the PU.1 or LUCAT1 TSS were cloned into the vector followed by lentiviral particle production (see below) and transduction; transduced cells (GFP+) were purified by cell sorting (Aria III, BD) and lysed immediately (PU.1) or cultured (LUCAT1). GuideRNA sequences are provided in Table S7.

### *Lentiviral transduction*

HEK293T cells were co-transfected with lentiviral vector, pseudotyping- and helper-plasmid (pVSVG and psPAX2) using lipofectamine 2000 (Thermo Fisher). For over-expression, the SparQ lentivector (Systembio, # QM511B-1) containing the RACE-refined PIRAT cDNA was used. Virus-containing supernatants were passed through a 0.45  $\mu\text{m}$  filter. Cells were transduced by resuspension in virus containing supernatants and centrifugation at 37 °C and 800 g for 2 h. 48 h later, transduced cells were purified by cell sorting (Aria III, BD) based on GFP-expression.

### *qRT-PCR*

RNA was isolated using TRIzol (Ambion), treated with DNaseI (Thermo Fisher) in the presence of recombinant RNase inhibitor (Promega) and concentration was determined (Nanodrop 2000 spectrometer, Thermo Scientific). cDNA was generated (High-Capacity cDNA Reverse Transcription Kit, Thermo Fisher) and quantitative PCR was performed (PowerUP SYBR Green Master Mix, Thermo Fisher) using a QuantStudio 3 instrument. For subcellular fractionation and CoIP analysis the Power SYBR RNA-to-Ct 1-Step Kit (Thermo Fisher) was used. Relative expression was calculated based on CT values, using the  $2^{-\Delta\Delta\text{CT}}$  method (3), where applicable relative to U6 snRNA. Primers are listed in Table S7.

### *Subcloning and sequencing of REXO1LP amplicons*

DNA from the elution fractions of PIRAT ChIRP experiments was used as a template for PCR reactions with the same primers as in Fig. S15A and using Advantage 2 proof-reading PCR polymerase (Takara). Experiments were conducted with ChIRP DNA from monocytes from three different blood donors. PCR products were subjected to gel-purification and sub-cloned using the Strataclone TA PCR cloning kit (Agilent). Insert sequences were determined by Sanger sequencing (Seqlab GmbH) and aligned using Multalin (<http://multalin.toulouse.inra.fr/multalin/>). Nucleotide variants in the sequenced inserts were counted and assigned to the three different donors.

### *RACE-PCR*

RACE-PCR was performed using the SMARTer 5'/3' RACE kit (Clontech) according to the manufacturer's instructions. Template poly(A) RNA was purified using oligo-d(T) coupled dynabeads (Thermo Fisher). RACE-PCR primers are listed in Table S7. RACE products were subjected to gel-purification and sub-cloned using the Strataclone UA PCR cloning kit (Agilent). Insert sequences were determined by Sanger sequencing (Seqlab GmbH).

### *Copy number enumeration*

PIRAT cDNA (Fig. S8) was amplified using Phusion PCR polymerase (Thermo Fisher), according to the manufacturer's instructions, and primers listed in Table S7. The forward primer (OBS-1898) contained a T7 RNA polymerase consensus binding site. The PCR amplicon was extracted from an agarose gel (Macherey-Nagel™ NucleoSpin™ Gel and PCR Clean-up Kit) and 150 ng were used as a template for RNA in vitro transcription (for 4 h), using the MEGAscript T7 transcription kit (Thermo Fisher), according to the manufacturer's instructions. Synthesized RNA was cleaned up using the Monarch RNA Cleanup column kit (NEB). RNA concentration was determined using the Agilent Bioanalyzer system, with an RNA Nano chip. RNA integrity was additionally controlled by running a sample on a MOPS / 1.2 % agarose / 1 % formaldehyde gel (10x MOPS buffer: 50 mM MOPS, 50 mM Na-acetate, 10 mM EDTA, pH 7.0), with Millennium RNA size marker (Thermo Fisher). PIRAT copy number was determined by qRT-PCR, as described in the main manuscript text.

### *Subcellular fractionation*

Cells were lysed (10 mM Tris, pH 8, 140 mM NaCl, 1.5 mM MgCl<sub>2</sub>, 0.5 % Igepal, 2 mM vanadyl ribonucleoside complex), incubated on ice for 5 min and centrifuged (1000 x g, 4 °C, 3 min). The supernatant (cytosolic fraction) was transferred to a new tube, centrifuged (3 min, maximum speed) and transferred to a new tube for RNA-extraction. The pellet (nuclear fraction) was washed two times with lysis buffer and once with lysis buffer containing 0.5 % deoxycholic acid (centrifugations at 4 °C and 1000 x g), followed by RNA-extraction.

### *RNA-FISH*

Tissues were derived as described (4) with Charité University Medicine Berlin Ethics Committee approval no. EA2/079/13, formalin fixed, paraffin embedded and sectioned at 4 µm on glass slides. Probe sequences were designed by Affymetrix (Homo sapiens PIRAT (RUO) Catalog no. VA1-3025697; Homo sapiens EEF1A1 Catalog no. VA1-10418). RNA-FISH was performed using the ViewRNATM ISH Tissue 1-Plex Assay (Affymetrix) with heat pretreatment for 10 min and protease digestion for 20 min. A probe homologous to EF1α served as positive control for the hybridization conditions on consecutive tissue sections. Diluent without probe served as control for background staining. Roti®-Mount FluorCare DAPI (Carl Roth®) was used for counterstaining of nuclei and as mounting medium. Photographs were taken using an Olympus DP 80 microscope at 600x magnification (DAPI signal: 345 nm; red probe signals: 550 nm).

### *Western blot*

Protein concentrations were determined using BCA (Pierce™ BCA Protein Assay Kit, ThermoFisher) and an Infinite PRO (Tecan) plate reader. Proteins were separated by SDS PAGE, using 10% polyacrylamide gels. Proteins were transferred onto a nitrocellulose membrane (Amersham™ Protran®, Sigma-Aldrich). For blot development and detection, the ECL Prime Western Blot Detection kit (Amersham) and a Chemostar Imager (INTAS Science Imaging) were used. Antibodies are listed in Table S8. Western blot full-scan is shown in Fig. S16A.

### *Flow cytometry*

Cells were identified by plotting the respective fluorescence channel against background-fluorescence or the side-scatter. The gating strategy is illustrated in Fig. S11F. For surface marker staining, 2 µl of fluorophore-coupled primary antibody were added to cells in 100 µl PBS containing 1 % FCS, followed by incubation on ice for 30 min. Cells were washed and resuspended in PBS containing 0.5 % FCS and subjected to FACS analysis (Guava EasyCyte, Millipore).

### *ChIP*

40 million cells per capture were crosslinked with PBS, 1 % formaldehyde for 10 min, quenched with 1/10th volume 1.25 M glycine for 5 min and resuspended in 800 µl lysis buffer (50 mM Tris-Cl, 10 mM EDTA, 1 % SDS, 1 mM PMSF). Lysate was sonicated (Diagenode Biorupter) until DNA appeared with a fragment size between 100 and 500 bp on agarose gels. Sample was adjusted with 3.6 ml ChIP Dilution Buffer (50 mM Tris-HCl, 0.167 M NaCl, 1.1% Triton X-100, 0.11% sodium deoxycholate), 2 ml RIPA-150 (50 mM Tris-HCl, 0.15 M NaCl, 1 mM EDTA pH8, 0.1% SDS, 1% Triton X-100, 0.1% sodium deoxycholate) and PMSF (1 mM). 60 µl of magnetic beads were coupled with PU.1 C1 + A7 antibody or FLAG antibody (Table S8), as described by Tawk et al. (5) and added to the diluted lysate, followed by rotation at 4 °C over-night. Upon one wash with RIPA-150, two washes with RIPA-500 (same as RIPA-150 but with 0.5 M NaCl), 2 washes with RIPA-LiCl (50 mM Tris-HCl, 1 mM EDTA pH 8, 1% Nonidet P-40, 0.7% sodium deoxycholate, 0.5 M LiCl<sub>2</sub>) and 2 washes with TE buffer (10 mM Tris-HCl, 1 mM EDTA), DNA input and bead samples were resuspended in 200 µl elution buffer (10 mM Tris-HCl, 0.3 M NaCl, 5 mM EDTA pH8, 0.5 % SDS). Until this step, all buffers were supplemented with cOmplete protease inhibitor (Roche). Following addition of 1 µl RNase A and incubation for 4 h at 65 °C beads were separated and supernatant was incubated with 10 µl of Proteinase K for 45 min at 50 °C. DNA was purified by PCI extraction and ethanol / sodium-acetate precipitation.

### *ChIRP*

Antisense DNA probes (Table S9) were synthesized at Metabion AG and 3' mono-biotinylated using terminal transferase (New England Biolabs) and Biotin-11-ddUTP (Jena Bioscience) according to the manufacturer's instructions. ChIRP (20 million CD14+ monocytes per capture) was performed as described previously (6).

### *UV crosslinking & Co-immunoprecipitation*

For co-immunoprecipitation (CoIP), 10<sup>7</sup> cells were UV-crosslinked (300 mJ / cm<sup>2</sup>) in petri dishes, on an ice bath. The CoIP procedure published by Tawk et al. (5) was used with minor modifications. For protein purification protein G dynabeads (Thermo Fisher), coupled with 2.5 µg of antibody (Table S8) were used. In PU.1 CLIP experiments, eluate fractions were split up for protein analysis by Western blot and RNA extraction as described above.

### *Single Cell RNA-sequencing analysis*

Single cell multiomics was performed using the BD Rhapsody system according to manufacturer's protocols. 250.000 PBMCs per sample (two patients and two healthy controls) were incubated with an individual oligo-labelled antibody (Multiplex Tag, BD Human Single-Cell Multiplexing Kit, Cat. No. 633781), for 20 minutes at room temperature. Cells were washed twice with BD Pharmingen Stain Buffer (Cat. No. 554656) and labelled cell suspensions were pooled and incubated with oligo-labelled AbSeq antibodies directed against CD206 (Cat. No. 940068), CD163 (Cat. No. 940058) and HLA-DR (Cat. No. 940010) for 30 minutes on ice. Upon two washes with Stain Buffer, cells were resuspended in Sample Buffer (Cat. No. 650000062) and viability-stained with 2 mM Calcein AM (Cat. No. C1430; Thermo Fisher Scientific, Dreieich, Germany) and 0.3 mM Draq7 (Cat. No. 564904) for 5 minutes at 37°C. The suspension was counted using a disposable hemocytometer (Cat. No. DHCN01-5; INCYTO, Cheonan, South Korea) and cell viability was determined.

The BD Rhapsody Cartridge (Cat. No. 400000847) was primed with 100% ethanol followed by 2 washes with Cartridge Wash Buffer 1 (Cat. No. 650000060) and one wash with Cartridge Wash Buffer 2 (Cat. No. 650000061). About 30.000 labelled cells were loaded and incubated for 15 minutes at room temperature. Excess fluid was removed and the cartridge was loaded with Cell Capture Beads (Cat. No. 650000089) and incubated for 3 minutes at room temperature. Excess

beads were washed off using Sample Buffer. Lysis Buffer was applied and beads were extracted from the cartridge using the BD Rhapsody Express instrument and washed twice with cold Bead Wash Buffer (Cat. No. 650000065).

The cDNA reaction mix was prepared as indicated in the manufacturer's protocol and mixed with the beads. The mixture was incubated in a thermomixer (37 °C, 1200 rpm, 20 minutes). The supernatant was removed and replaced by the Exonuclease I mix prepared according to the manufacturer's protocol. The bead suspension was placed on the thermomixer (37°C, 1200 rpm, 30 minutes, followed by 80 °C without shaking for 20 minutes). The suspension was then briefly placed on ice and the supernatant was removed. Finally, beads were resuspended in Bead Resuspension Buffer (Cat. No. 650000066).

Single cell mRNA, multiplex sample Tag, and AbSeq libraries were prepared using the BD Rhapsody™ Single-Cell Analysis system (Cat. No. 633774) according to manufacturer's recommendation (Doc ID: 214508). Briefly, the Bead Resuspension Buffer was removed from the beads and replaced by the PCR1 reaction mix containing the primers specific for the AbSeq and multiplex sample tags, and genes of the Human Immune Response Panel (Cat. No. 633750) supplemented with custom-made primers for additional genes (see NCBI GEO GSE142503). Beads were placed in the thermal cycler for 11 cycles of the PCR program indicated in the protocol. The supernatant was retained and the PCR products for Abseq and multiplex sample tags, as well as the mRNA PCR product were separated and purified by double-sided size selection using AMPure XP magnetic beads (Cat. No. A63880; Beckman Coulter, Krefeld, Germany). A fraction of the Abseq/multiplex sample tag PCR 1 product, as well as the mRNA PCR 1 product were further amplified with a second PCR of 10 cycles and subsequent purification using AMPure XP beads, resulting in multiplex sample tag and mRNA PCR 2 product. Finally, the Abseq/multiplex sample tag PCR 1 product for the Abseq library, and both PCR 2 products for each the multiplex sample tag and mRNA libraries were amplified by the final index PCR for 7 cycles each with subsequent purification afterwards. Concentrations of the index PCR products were determined using the Qubit Fluorometer and the Qubit dsDNA HS Kit (Cat. No. Q32851; Thermo Fisher Scientific) and quality control was performed on the Agilent 2100 Bioanalyzer with the High Sensitivity DNA Kit (Cat. No. 5067-4626; Agilent, Waldbronn, Germany). Mixed libraries were sequenced on a NextSeq550 with 2 x 75 bp paired-end reads.

After pre-processing of BD Rhapsody scRNA-seq data, read counts were loaded into the R (v3.6.3) environment and further analyzed using the Seurat package (v3.1.4). The following quality criteria were used to include cells for the downstream analysis: at least 25 genes were expressed, and at least 1,000 but no more than 70,000 transcripts were detected per cell.

Following the Seurat workflow, the read counts were normalized and scaled by NormalizeData and ScaleData functions of the Seurat package, respectively. Principal component analysis (PCA) was performed by RunPCA using top 2,000 variable features that were selected using the default selection method ("vst") in Seurat. Next, based on the first 15 PCs, cell clusters were identified with the Louvain algorithm at resolution of 0.4. Finally, in a two-dimensional space, a UMAP was generated to visualize the identified cell clusters.

To identify marker genes of each cell cluster, differentially expressed (DE) genes were tested by FindAllMarkers functions in Seurat using the default test (Wilcoxon Rank Sum test). Significantly differentially expressed genes were determined by 1) log-fold changes > 0.3, 2) expressed in at least a fraction of 0.2 cells in each tested population, and 3) adjusted p value < 0.05 (Bonferroni correction). DE analyses were used to identify cluster marker genes by comparing the expression of upregulated genes in cells between one cluster and the rest of cells.

Cell clusters were firstly assigned using the SingleR (v1.0.6) package based on four reference dataset which are provided in the package, including BlueprintEncodeData, DatabasImmuneCellExpressionData, HumanPrimaryCellAtlasData, and MonacoImmuneData. Then, the assigned cell cluster annotations were double-checked by comparing the cell type specifically expressed marker genes from public resources.

To dissect the different profiles between COVID-19 patients and controls, publicly reported COVID-19 related genes were selected and their expression profiles in patients and controls were

visualized for each identified cell cluster using a modified DotPlot function in Seurat. For PIRAT and S1000A8/A9 correlation analysis, the Spearman's correlation coefficient was calculated based on the gene expression across all cells and visualized using the R/ggplot2 package. P-value  $\leq 0.05$  was considered as a threshold for statistical significance.

#### *Bulk sequencing and bioinformatics analysis*

RNA was isolated (miRVana kit, Thermo Fisher) and DNaseI-digested as described above. RNA-quality was evaluated (Experion RNA analysis kit, BioRad) and Illumina TruSeq mRNA libraries were generated (Genomics Core Facility, Philipps-University Marburg), and analysed on a HiSeq 1500 machine. CLIP-seq and ChIRP-seq libraries were generated at Vertis Biotech AG (Germany) using in-house protocols and sequenced on a NexSeq500 device. Human Bodymap raw data (Fig. S1A) were obtained through European Nucleotide Archive (datasets ERR030888-ERR030903) (7). Peripheral blood leukocyte raw data (Fig. 1B) were downloaded from NCBI GEO (GSE62408 and GSE60424). ENCODE CD14<sup>+</sup>-monocyte DNaseI-Seq, H3K4me3- and H3K27me3-ChIP-Seq data were downloaded from NCBI GEO (SRR608865, SRR608866, SRR568364, SRR568365, SRR568417, SRR568418) (8). NCBI data were extracted using the SRA toolkit. Haematopoietic lineage expression raw data were obtained through the Blueprint Consortium (EGAD00001000939, EGAD00001000919, EGAD00001000907, EGAD00001000922, EGAD00001001477, EGAD00001000675) (9).

Reads in fastq-format were quality-trimmed using the CLC genomics workbench, with standard settings. For genome-wide ChIRP-seq peak calling the CLC genomics workbench "Transcription Factor ChIP-Seq" module was used, with a P-value cut-off at 0.05 and the ChIRP-seq control datasets (control track in Fig. 6F) as background control. Resulting peaks were annotated using the "Annotate with Nearby Gene Information" module and GENCODE GRCh38 reference genome data. Results, including peak position and shape information are shown in Table S5. RNA-seq reads were mapped to the human GRCh38 reference (GENCODE), using the CLC genomics workbench. Gene expression changes were calculated using RPKMs (based on uniquely mapped reads). Genes with RPKMs  $< 0.5$  under all experimental conditions in the respective RNA-seq dataset were excluded from further analysis. Hierarchical clustering was done using Cluster 3.0 (Eisen lab). Heatmaps were generated using JAVA TreeView (10). For pathway enrichment analysis and induced network analysis ConsensusPathDB (11) was used. For illustrating the overlap between PIRAT- and LUCAT1-controlled genes (Fig. 5H), Cytoscape was used. For prediction of transcription factors (Fig. S12A), the ENCODE and ChEA Consensus TFs tab at Enrichr (<https://maayanlab.cloud/Enrichr/>) was used. For co-expression analysis (Fig. 1E)  $R^2$  was calculated (Excel) based on RPKMs from RNA-seq dataset introduced in Fig. 1B, and ENSEMBL-IDs of genes with  $R^2$  values  $\geq 0.8$  were analysed in ConsensusPathDB. PCA analysis was done based on row Z-scores, using the R-script prcomp (stats) with rgl package. Other plots were generated using GraphPad Prism, Excel or BoxPlotR (<http://shiny.chemgrid.org/boxplotr/>). Statistical analysis was performed using GraphPad Prism. Sequence conservation was determined using NCBI BLASTN and the major species reference genome, respectively. BLAST hits with  $\geq 20$  complementary nucleotides located within a genomic range of max. 100 kb were considered. ENSEMBL BLASTN was used in Fig. S15D. All obtained BLASTN-hits are shown in the ENSEMBL genome browser screenshot.



## Supplementary References

1. Janga H, *et al.* (2018) Cas9-mediated excision of proximal DNaseI/H3K4me3 signatures confers robust silencing of microRNA and long non-coding RNA genes. *PLoS one* 13(2):e0193066.
2. Thakore PI, *et al.* (2015) Highly specific epigenome editing by CRISPR-Cas9 repressors for silencing of distal regulatory elements. *Nature methods* 12(12):1143-1149.
3. Livak KJ & Schmittgen TD (2001) Analysis of relative gene expression data using real-time quantitative PCR and the 2(-Delta Delta C) method. *Methods* 25(4):402-408.
4. Aznaourova M, *et al.* (2020) Noncoding RNA Mall1 is an integral component of the TLR4-TRIF pathway. *Proceedings of the National Academy of Sciences of the United States of America* 117(16):9042-9053.
5. Tawk C, Sharan M, Eulalio A, & Vogel J (2017) A systematic analysis of the RNA-targeting potential of secreted bacterial effector proteins. *Sci Rep-Uk* 7.
6. Chu C, Quinn J, & Chang HY (2012) Chromatin isolation by RNA purification (ChIRP). *Journal of visualized experiments : JoVE* (61).
7. Illumina, Inc. 25861 Industrial Blvd Hayward, CA 94545, United States, Human Bodymap 2.0, *European Nucleotide Archive*, <https://www.ebi.ac.uk/ena/browser/view/PRJEB2445?show=reads>, data accessed on 2017-05-29.
8. The ENCODE Consortium, ENCODE epigenomic data, *NCBI Sequence Read Archive*, <https://www.ncbi.nlm.nih.gov/bioproject/PRJNA63443>, data accessed on 2017-08-16.
9. The Blueprint Consortium, Blueprint haematopoietic lineage data, *European Genome Phenome Archive*, <https://ega-archive.org/studies/EGAS00001000284>, <https://ega-archive.org/datasets/EGAD00001000675>, <https://ega-archive.org/studies/EGAS00001000327>, data accessed on 2019-06-19.
10. Saldanha AJ (2004) Java Treeview--extensible visualization of microarray data. *Bioinformatics* 20(17):3246-3248.
11. Kamburov A, Wierling C, Lehrach H, & Herwig R (2009) ConsensusPathDB--a database for integrating human functional interaction networks. *Nucleic acids research* 37(Database issue):D623-628.
